# Supplementary material for: [(Flu)-(CH2)2-(NHC)-CH2-(NHC)-(CH2)2-(Flu)]2−: an ‘all-organic’ hybrid and flexible ligand that enwraps a Ca2+pseudo-tetrahedrally
Source: Royal Society of Chemistry journal article supplement (doi:10.1039/d2cc04700d), 2022-01-01
Supplement: d2cc04700d1.pdf [file d2cc04700d1.pdf]

## Supporting Information

### **[(Flu)-(CH<sub>2</sub>)<sub>2</sub>-(NHC)-CH<sub>2</sub>-(NHC)-(CH<sub>2</sub>)<sub>2</sub>-(Flu)]<sup>2-</sup>: an ‘all-organic’ hybrid and flexible ligand that enwraps a Ca<sup>2+</sup> pseudo-tetrahedrally.**

Sudip Baguli,<sup>a</sup> Shovan Das,<sup>b</sup> Mahua Chakraborty,<sup>a</sup> Santu Goswami,<sup>a</sup> Ayan Datta,<sup>b,\*</sup> and Debabrata Mukherjee<sup>a,\*</sup>

<sup>a</sup> Indian Institute of Science Education and Research Kolkata, Mohanpur, Nadia, 741246, India

<sup>b</sup> School of Chemical Sciences, Indian Association for the Cultivation of Science, 2A and 2B Raja SC Mallick Road, Jadavpur, Kolkata, 700032, India.

## Table of Contents

|                                  |            |
|----------------------------------|------------|
| General Procedure                | S2         |
| <b>1. Experimental Procedure</b> | <b>S2</b>  |
| Synthesis of <b>1</b>            | S2         |
| Synthesis of <b>2-4</b>          | S2         |
| <b>2. Spectroscopic Data</b>     | <b>S4</b>  |
| <b>3. Crystallographic Data</b>  | <b>S8</b>  |
| <b>4. DFT Analyses</b>           | <b>S9</b>  |
| <b>5. References</b>             | <b>S29</b> |

## General Procedure

All reactions were performed under a dry N<sub>2</sub>/Ar atmosphere using the standard Schlenk technique or inside a glovebox, unless otherwise stated. Prior to use, glassware were dried overnight at 130 °C and solvents were dried, distilled and degassed using standard methods. Bis(1*H*-imidazole-1-yl)methane<sup>1</sup> and 9-(2-bromoethyl)-9*H*-fluorene<sup>2</sup> were prepared following the literature procedure. All other reagents are available commercially. <sup>1</sup>H and <sup>13</sup>C{<sup>1</sup>H} NMR spectra were recorded on a Bruker (Avance NEO) or a Bruker (Avance III) spectrometer operating at 500 MHz, at ambient temperature unless otherwise mentioned. Chemical shifts (δ in ppm) in the <sup>1</sup>H and <sup>13</sup>C{<sup>1</sup>H} NMR spectra were referenced to the residual signals of the deuterated solvents. Abbreviations for NMR spectra: s (singlet), d (doublet), t (triplet), q (quartet), sep (septet), br (broad). Mass spectrometric analyses were done on a Bruker micrOTOF–Q II Spectrometer. X-ray diffraction data were collected on a Rigaku Synergy xtalab diffractometer. Single crystal diffraction data are reported in crystallographic information files (cif) accompanying this document.

## 1. Experimental Procedure.

### 1.1. Synthesis of LH<sub>4</sub>Br<sub>2</sub> (1)

A 50 ml round bottom flask fitted with a reflux condenser was charged with bis(1*H*-imidazole-1-yl)methane (1.100 g, 7.42 mmol), 9-(2-bromoethyl)-9*H*-fluorene (4.060 g, 14.80 mmol), and 20 mL of dry acetonitrile under a N<sub>2</sub> atmosphere and heated at 120 °C for 6 days. The reaction progress was monitored by TLC. It should be noted that a <1 g scale preparation is nearly completed within 2 days. However, in upscaled reactions, extra time is required to ensure the reaction completion. Upon completion, all volatiles were removed under vacuum to obtain a sticky solid which was vigorously stirred overnight with excess of Et<sub>2</sub>O and sonicated for two more hours to obtain a free-flowing white suspension. Subsequent filtration followed by washing the white solid residue three more times with excess of Et<sub>2</sub>O afforded **1** (59% yield) as a white powder.

<sup>1</sup>H NMR (500 MHz, DMSO-*d*<sub>6</sub>) δ 9.26 (s, 2H, imidazolium-*H*), 7.91 (d, *J* = 7.5 Hz, 4H, Flu), 7.87 (br, 2H, imidazole backbone-*H*), 7.82 (br, 2H, imidazole backbone-*H*), 7.63 (d, *J* = 7.5 Hz, 4H, Flu), 7.41 (t, *J* = 7.5 Hz, 4H, Flu), 7.33 (t, *J* = 7.3 Hz, 4H, Flu), 6.46 (s, 2H, lmd-CH<sub>2</sub>-lmd), 4.18 (t, *J* = 5.7 Hz, 2H, 9CH-Flu), 4.10-4.05 (m, 4H, lmd-CH<sub>2</sub>-CH<sub>2</sub>-Flu), 2.66-2.60 (m, 4H, lmd-CH<sub>2</sub>-CH<sub>2</sub>-Flu). <sup>13</sup>C{<sup>1</sup>H} NMR (126 MHz, DMSO-*d*<sub>6</sub>) δ 145.3, 140.4, 137.4, 127.5, 127.2, 124.6, 123.1, 121.9, 120.3, 57.8 (lmd-CH<sub>2</sub>-lmd), 46.8 (lmd-CH<sub>2</sub>-CH<sub>2</sub>-Flu), 44.3 (9CH-Flu), 31.7 (lmd-CH<sub>2</sub>-CH<sub>2</sub>-Flu). HRMS-(*m/z*): [M]<sup>2+</sup> calc. for [C<sub>37</sub>H<sub>34</sub>N<sub>4</sub>]<sup>2+</sup>, 267.14 found 267.14.

### 1.2. Synthesis of [(LH)Ca(HMDS)] (2).

Inside the glovebox, a 5 mL screw cap vial fitted with a magnetic bead was charged with CaI<sub>2</sub> (0.100 g, 0.340 mmol), KHMDS (0.136 g, 0.681 mmol), and 2 mL of toluene and stirred at room temperature for 36 hours. The resulting white suspension was filtered directly onto **1** (0.118 g, 0.170 mmol) in another 10 mL screw cap vial fitted with a magnetic bead. The reaction mixture which immediately turned orange was stirred for two hours at room temperature. Subsequent

filtration and storing the filtrate in the  $-40\text{ }^{\circ}\text{C}$  freezer for 48 h afforded orange crystals of **2** (25 % yield) which are of X-ray quality. After isolating the crystals, excess hexane was added to the remaining mother liquor to precipitate out the rest of **2** as an orange solid. The solid was further washed with hexane and benzene consecutively to remove any soluble impurities. The orange residue was finally dried under high vacuum to afford **2** in overall 85% yield.

$^1\text{H}$  NMR (500 MHz, DMSO)  $\delta$  7.89 (d,  $J = 7.6$  Hz, flu-*H*, 5H), 7.35 (d,  $J = 8.1$  Hz, Imidazole backbone-*H*, 4H), 7.26 (s, 1H), 6.87 (t,  $J = 7.8$  Hz, 5H), 6.42 (t,  $J = 7.1$  Hz, 5H), 6.15 (s, N- $\text{CH}_2$ -N, 2H), 4.21 – 4.11 (m, N- $\text{CH}_2$ - $\text{CH}_2$ -Flu, 4H), 3.48 – 3.39 (m, N- $\text{CH}_2$ - $\text{CH}_2$ -Flu, 4H), 0.01 (s, 19H).  $^{13}\text{C}\{^1\text{H}\}$  NMR (126 MHz, DMSO)  $\delta$  134.3, 120.9, 118.7, 118.5, 113.1, 107.4, 89.0, 51.7, 29.5, 2.8. Elemental analysis for  $\text{C}_{43}\text{H}_{49}\text{N}_5\text{CaSi}_2$ : Calcd. C, 70.54; H, 6.75; N, 9.57; Found C, 68.62; H, 6.55; N, 9.22.

### 1.3. Synthesis of [(L)Ca] (**3**).

Heating a benzene suspension of **2** (30mg) in a teflon-stoppered storage tube at  $80\text{ }^{\circ}\text{C}$  for 12 h resulted in a quantitative conversion of **2** into **3** as red crystals which are of X-ray quality. The crystals were isolated by washing with fresh benzene to remove the  $\text{HN}(\text{SiMe}_3)_2$  byproduct and dried under vacuum.

$^1\text{H}$  NMR (500 MHz, DMSO- $d_6$ )  $\delta$  7.88 (d,  $J = 7.6$  Hz, flu-*H*, 4H), 7.37 (residual benzene), 7.35 (d,  $J = 8.1$  Hz, flu-*H*, 4H), 7.28 (d,  $J = 14.0$  Hz, Imidazole backbone-*H*, 4H), 6.86 (t,  $J = 7.3$  Hz, flu-*H*, 4H), 6.42 (t,  $J = 7.0$  Hz, flu-*H*, 4H), 6.14 (s, N- $\text{CH}_2$ -N, 2H), 4.22 – 4.12 (m, N- $\text{CH}_2$ - $\text{CH}_2$ -Flu, 4H), 3.50 – 3.38 (m, N- $\text{CH}_2$ - $\text{CH}_2$ -Flu, 4H).  $^{13}\text{C}\{^1\text{H}\}$  NMR (126 MHz, DMSO- $d_6$ )  $\delta$  134.3, 128.3(residual benzene), 120.9, 118.7, 118.5, 113.1, 107.4, 89.0, 51.7, 29.5. Elemental analysis for  $\text{C}_{37}\text{H}_{31}\text{CaN}_4,2(\text{C}_6\text{H}_6)$ : Calcd C, 80.84; H, 5.95; N, 7.70; Found C, 77.92; H, 6.23; N, 7.44.

### 1.4. Synthesis of Compound [(LH)Li<sub>2</sub>(HMDS)] (**4**).

Inside the glovebox, a 5 mL screw cap vial fitted with a magnetic bead was charged with **1** (0.150 g, 0.216 mmol), LiHMDS (0.145 g, 0.864 mmol), and 4 mL of toluene and stirred at room temperature for 2 hours, during which the reaction color turned orange. It was then filtered into another 10 mL screw cap vial. Subsequent cooling at  $-40\text{ }^{\circ}\text{C}$  afforded dark orange crystals of **4** (20 % yield) which are of X-ray quality. After isolating the crystals, excess hexane was added to the remaining mother liquor to precipitate out the rest of **4** as an orange solid. The solid was further washed with hexane to remove any soluble impurities. The orange residue was finally dried under high vacuum to afford **4** in overall 57% yield.

$^1\text{H}$  NMR (500 MHz, DMSO- $d_6$ )  $\delta$  7.90 (d,  $J = 8.5$  Hz, flu-*H*, 5H), 7.37 (d,  $J = 8.1$  Hz, Imidazole backbone-*H*, 4H), 7.27 (s, 1H), 6.92 (t,  $J = 7.8$  Hz, flu-*H*, 5H), 6.48 (t,  $J = 7.1$  Hz, flu-*H*, 5H), 6.15 (s, N- $\text{CH}_2$ -N, 2H), 4.19-4.12 (m, N- $\text{CH}_2$ - $\text{CH}_2$ -Flu, 4H), 3.47-3.41 (m, N- $\text{CH}_2$ - $\text{CH}_2$ -Flu, 4H), 0.03 (s, 18H).  $^{13}\text{C}\{^1\text{H}\}$  NMR (126 MHz, DMSO- $d_6$ )  $\delta$  134.4, 120.9, 118.7, 118.5, 113.1, 107.4, 89.1, 51.6, 29.6, 3. Elemental analysis for  $\text{C}_{43}\text{H}_{49}\text{Li}_2\text{N}_5\text{Si}_2,3(\text{C}_7\text{H}_8)$ : Calcd C, 76.90; H, 7.36; N, 7.87; Found C, 74.72; H, 7.13; N, 7.39.

## 2. Spectroscopic Data.

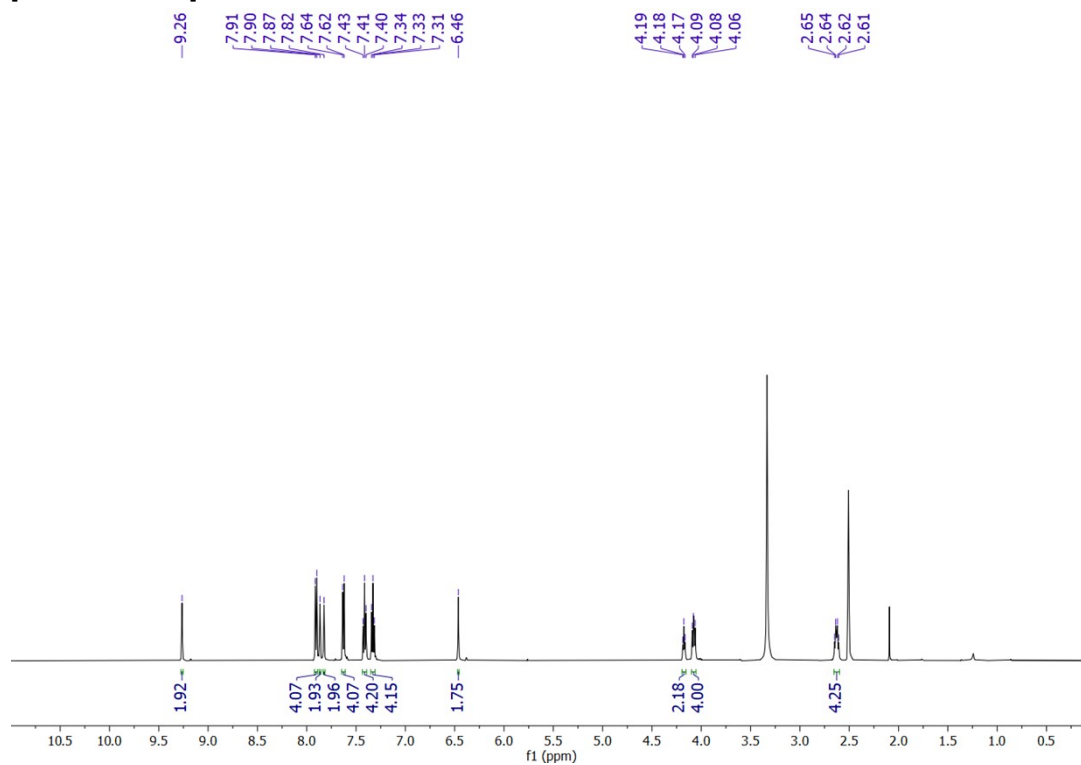

Fig-1.  $^1\text{H}$  NMR spectrum of **1** in  $\text{DMSO-}d_6$ .

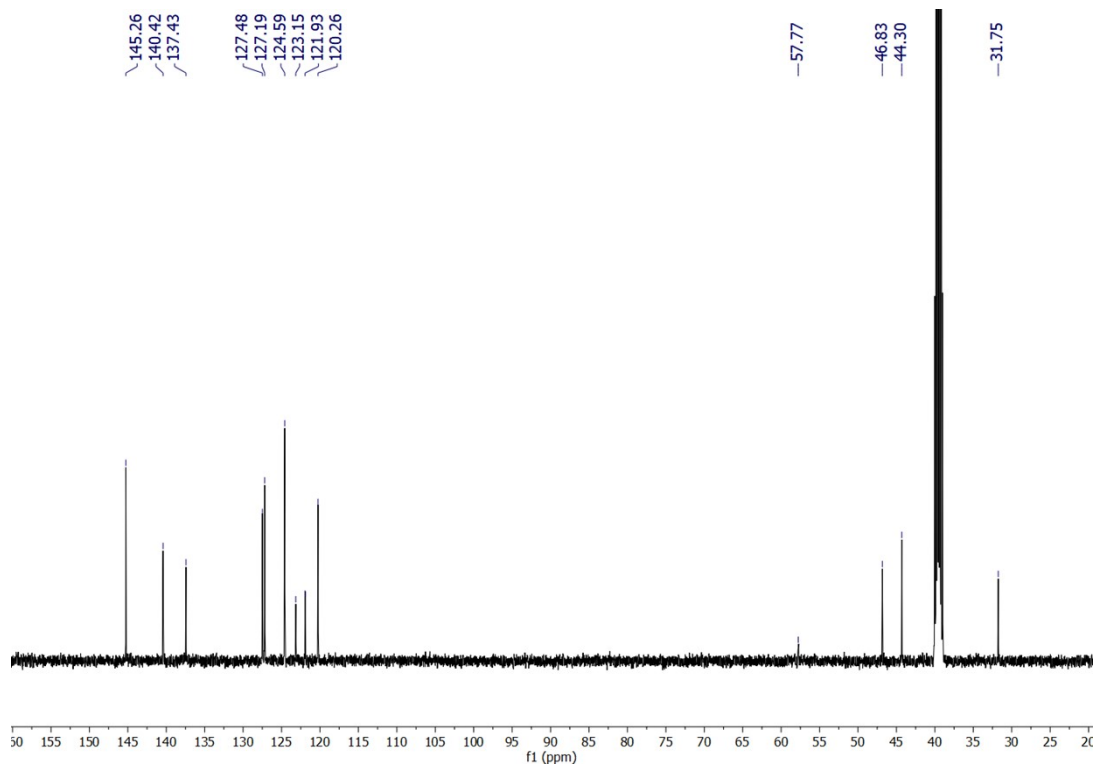

Fig-2.  $^{13}\text{C}\{^1\text{H}\}$  NMR spectrum of **1** in  $\text{DMSO-}d_6$ .

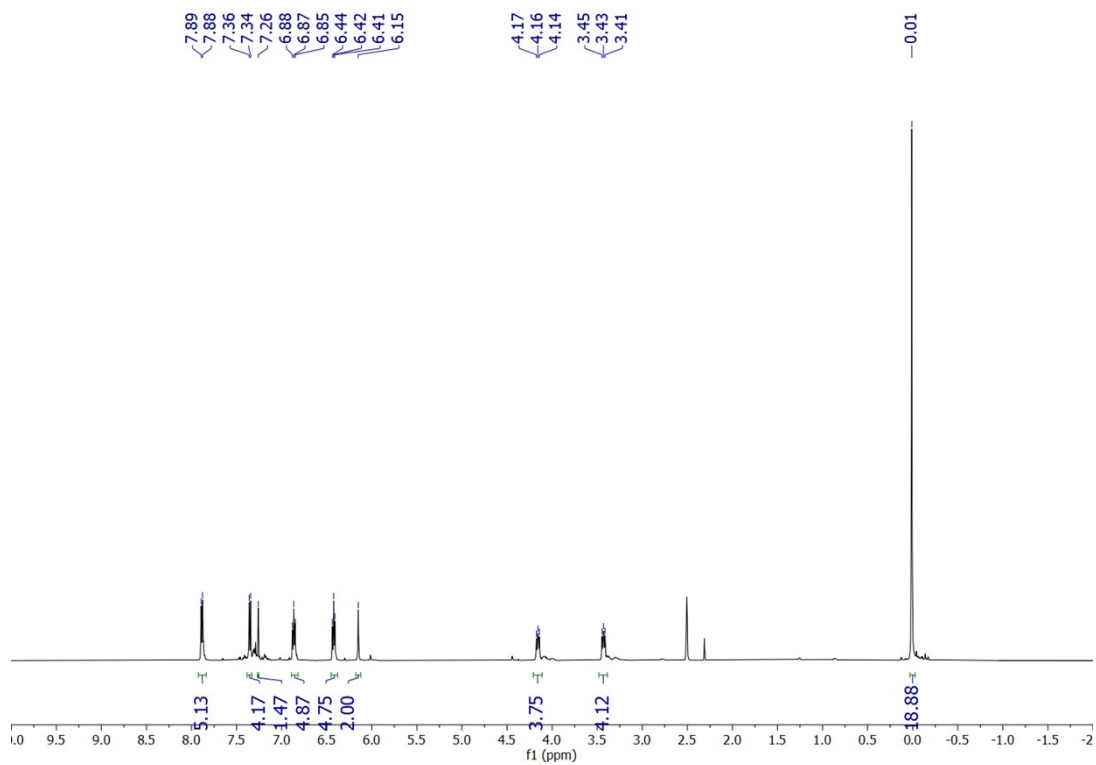

Fig-3.  $^1\text{H}$  NMR spectrum of **2** in  $\text{DMSO-}d_6$ .

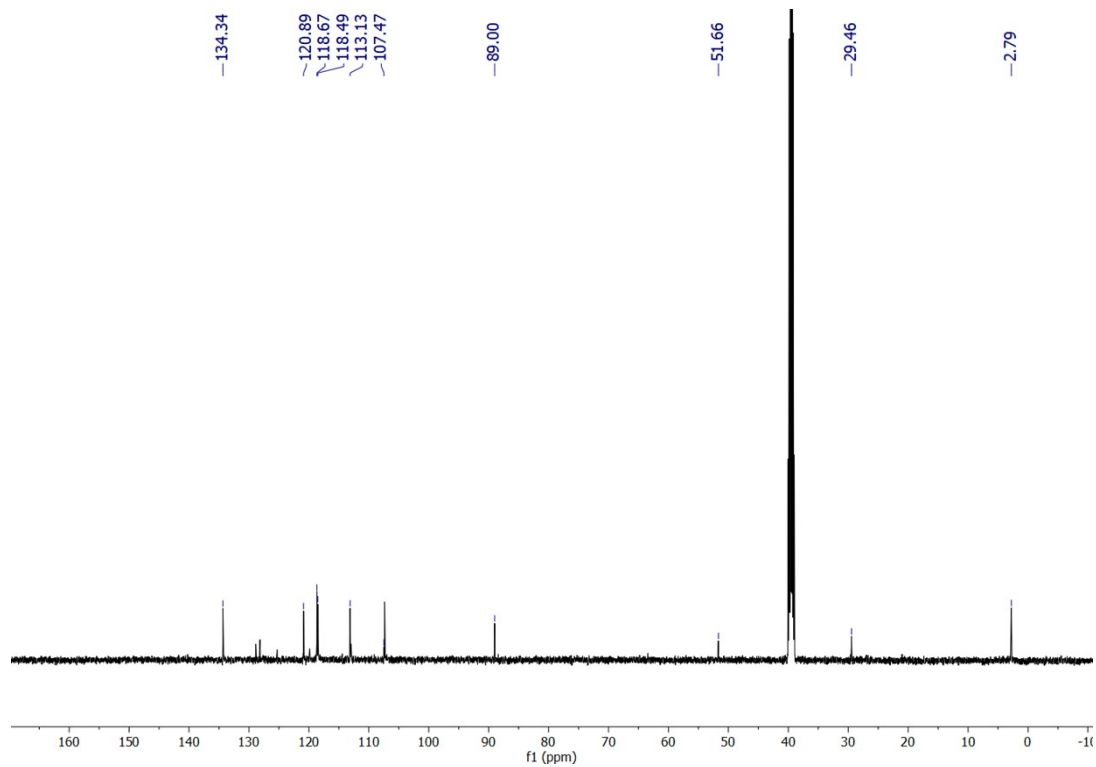

Fig-4.  $^{13}\text{C}$  NMR spectrum of **2** in  $\text{DMSO-}d_6$ .

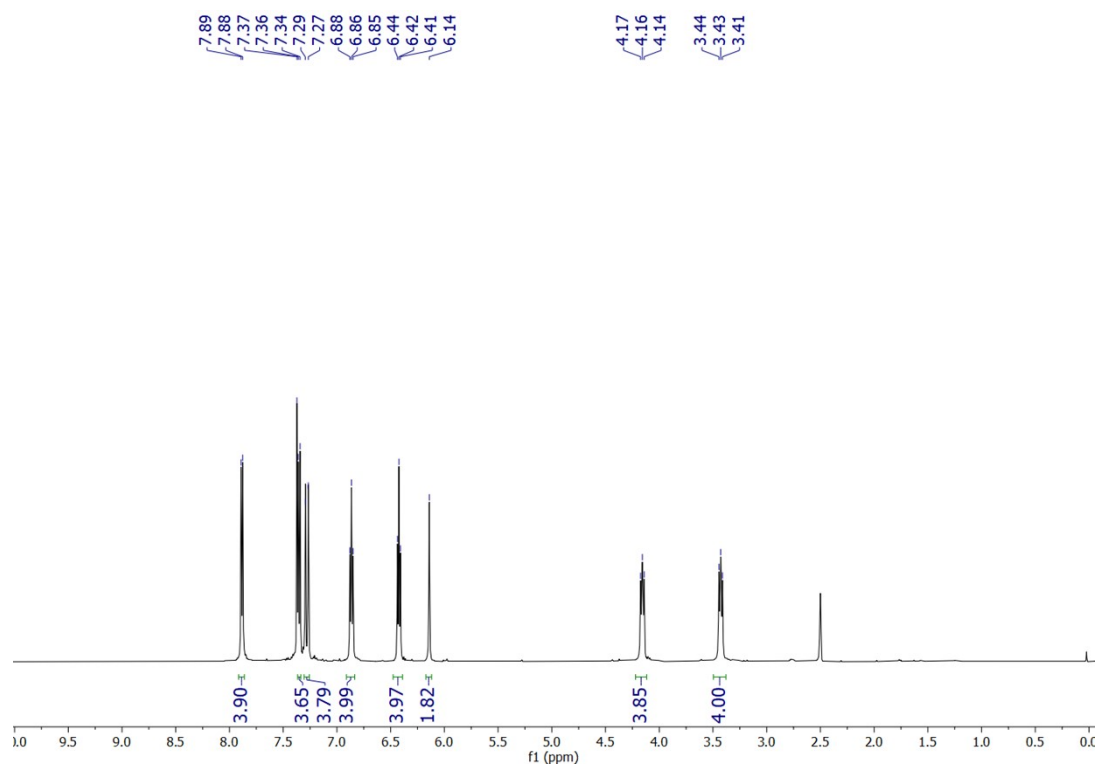

Fig-5.  $^1\text{H}$  NMR spectrum of **3** in  $\text{DMSO-}d_6$ .

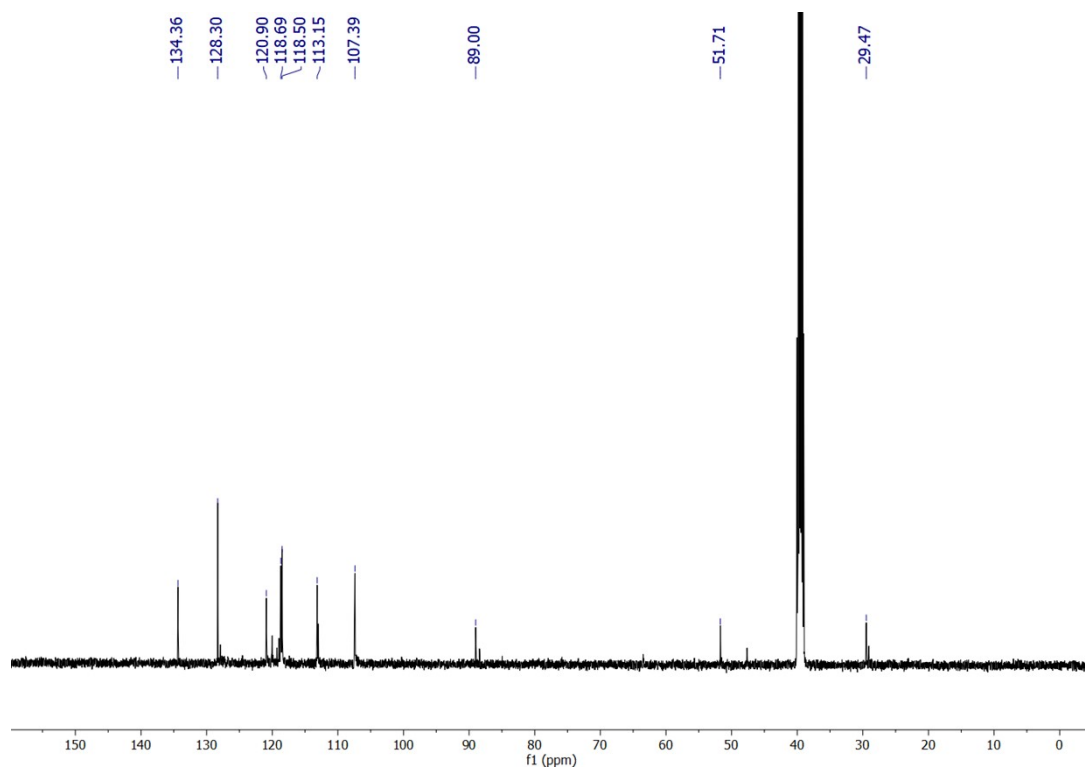

Fig-6.  $^{13}\text{C}\{^1\text{H}\}$  NMR spectrum of **3** in  $\text{DMSO-}d_6$ .

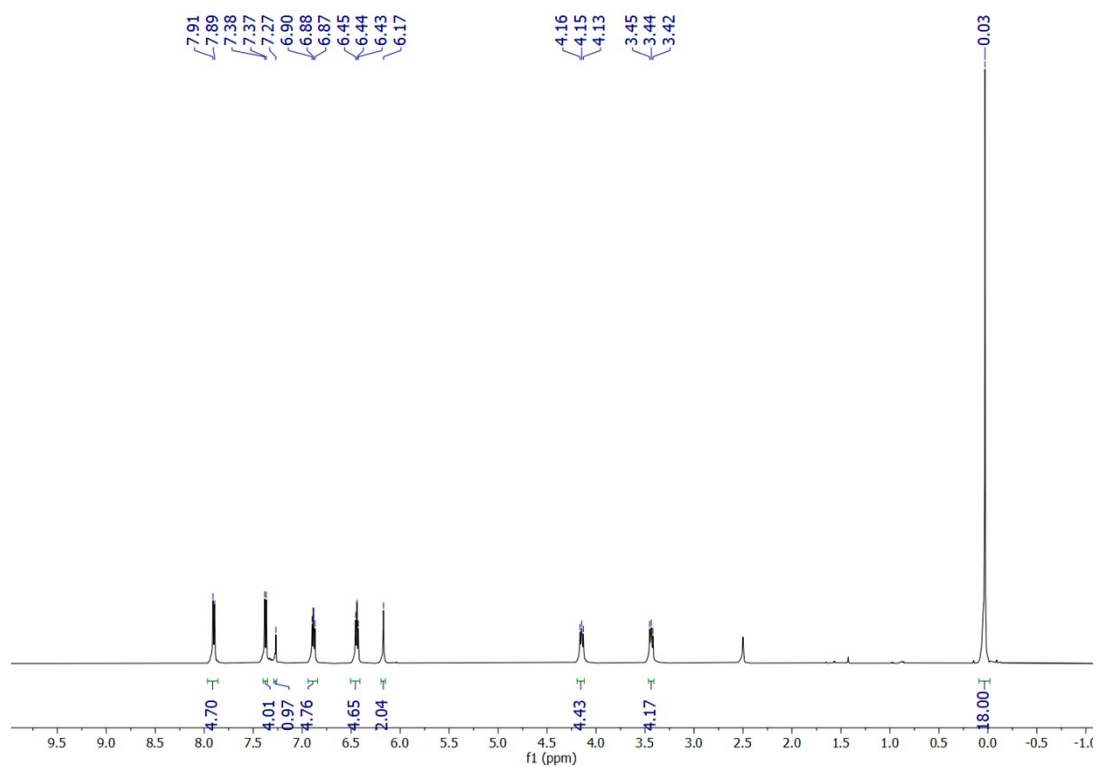

Fig-7.  $^1\text{H}$  NMR spectrum of **4** in  $\text{DMSO-}d_6$ .

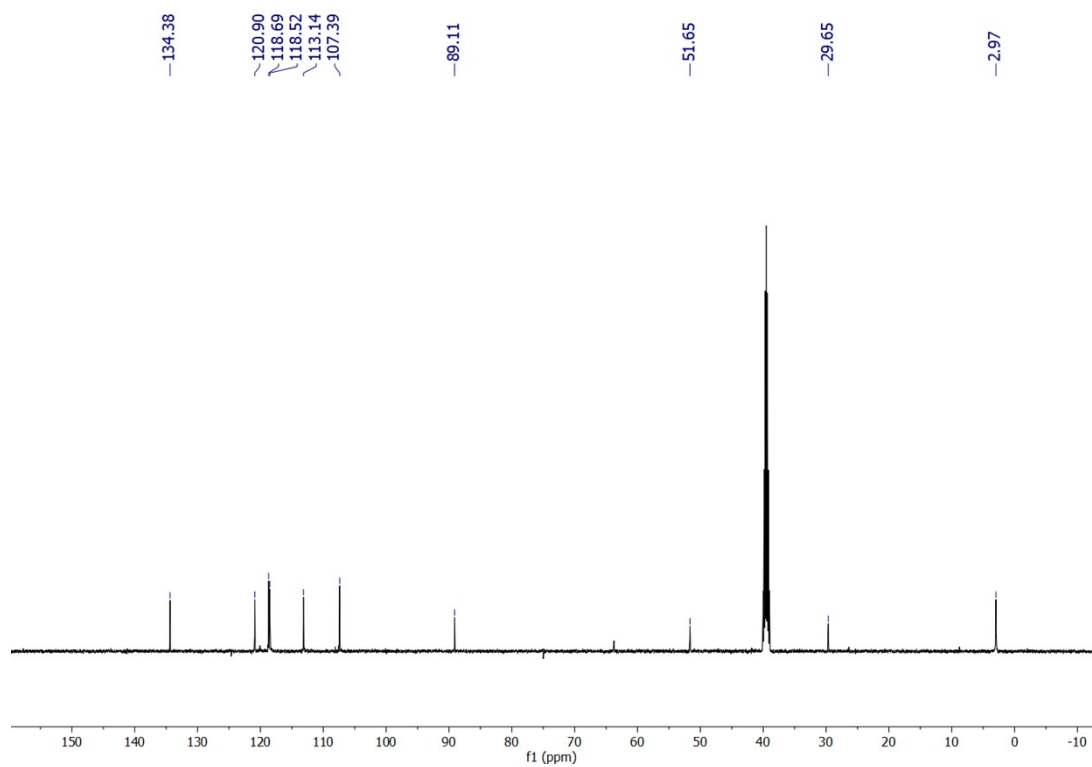

Fig-8.  $^{13}\text{C}\{^1\text{H}\}$  NMR spectrum of **4** in  $\text{DMSO}-d_6$ .

### 3. Crystallographic Data.

X-ray diffraction data were collected on a Rigaku XtaLAB Synergy, Dualflex four-circle diffractometer with HyPix3000 detector and  $\text{Cu-K}_\alpha$  radiation. Measurements were carried out at 100 K (**2**), (**3**) and (**4**) respectively. The structures were solved by intrinsic phasing using SHELXT.<sup>3</sup> all refinements were carried out against  $F^2$  with ShelXL<sup>4</sup> as implemented in the program system Olex2.<sup>5</sup> The non-hydrogen atoms were refined with anisotropic displacement parameters. All hydrogen atoms were included in calculated positions and treated as riding throughout the refinement. Refinement results are given in Table S1. Graphical representations were performed with the program DIAMOND.<sup>6</sup> CCDC- 2168390 (**2**), CCDC- 2168389 (**3**) and CCDC- 2177822 (**4**) contain the supplementary crystallographic data for this paper. These data can be obtained free of charge from the Crystallographic Data Centre via [www.ccdc.cam.ac.uk/data\\_request/cif](http://www.ccdc.cam.ac.uk/data_request/cif).



**Table S1:** Crystallographic data of **2**, **3** and **4**.

|                                                               | <b>2</b>                                                                     | <b>3</b>                                                                     | <b>4</b>                                                                       |
|---------------------------------------------------------------|------------------------------------------------------------------------------|------------------------------------------------------------------------------|--------------------------------------------------------------------------------|
| formula                                                       | C <sub>43</sub> H <sub>49</sub> CaN <sub>5</sub> Si <sub>2</sub>             | C <sub>49</sub> H <sub>43</sub> CaN <sub>4</sub>                             | C <sub>57</sub> H <sub>65</sub> Li <sub>2</sub> N <sub>5</sub> Si <sub>2</sub> |
| <i>F</i> w /g·mol <sup>-1</sup>                               | 732.13                                                                       | 727.95                                                                       | 890.20                                                                         |
| cryst. color, habit                                           | Dark orange                                                                  | Dark red                                                                     | Dark Orange                                                                    |
| crystal size / mm                                             | 0.15 × 0.14 × 0.09                                                           | 0.5 × 0.096 × 0.083                                                          | 0.6 × 0.34 × 0.18                                                              |
| crystal system                                                | triclinic                                                                    | monoclinic                                                                   | orthorhombic                                                                   |
| space group                                                   | <i>P</i> -1                                                                  | <i>P</i> 2 <sub>1</sub> / <i>n</i>                                           | <i>Pna</i> 2 <sub>1</sub>                                                      |
| <i>a</i> / Å                                                  | 9.5409(2)                                                                    | 18.9502(2)                                                                   | 12.11370(10)                                                                   |
| <i>b</i> / Å                                                  | 15.2405(2)                                                                   | 9.61450(10)                                                                  | 30.6579(3)                                                                     |
| <i>c</i> / Å                                                  | 15.8200(2)                                                                   | 21.1384(2)                                                                   | 15.47960(10)                                                                   |
| $\alpha$ / °                                                  | 111.179(2)                                                                   | 90                                                                           | 90                                                                             |
| $\beta$ / °                                                   | 105.9930(10)                                                                 | 104.1130(10)                                                                 | 90                                                                             |
| $\gamma$ / °                                                  | 97.2430(10)                                                                  | 90                                                                           | 90                                                                             |
| <i>V</i> / Å <sup>3</sup>                                     | 1995.57(6)                                                                   | 3735.10(7)                                                                   | 5748.82(8)                                                                     |
| <i>Z</i>                                                      | 2                                                                            | 4                                                                            | 4                                                                              |
| <i>d</i> <sub>calc</sub> /Mg·m <sup>-3</sup>                  | 1.218                                                                        | 1.295                                                                        | 1.029                                                                          |
| $\mu$ (CuK $\alpha$ )/mm <sup>-1</sup>                        | 2.205                                                                        | 1.759                                                                        | 0.834                                                                          |
| <i>F</i> (000)                                                | 780.0                                                                        | 1540.0                                                                       | 1904.0                                                                         |
| 2 $\theta$ range / °                                          | 6.388 to 136.486                                                             | 5.622 to 136.46                                                              | 6.396 to 136.396                                                               |
| index ranges                                                  | -11 ≤ <i>h</i> ≤ 11, -18 ≤ <i>k</i> ≤ 18, -19 ≤ <i>l</i> ≤ 18                | -22 ≤ <i>h</i> ≤ 22, -11 ≤ <i>k</i> ≤ 10, -25 ≤ <i>l</i> ≤ 19                | -14 ≤ <i>h</i> ≤ 14, -36 ≤ <i>k</i> ≤ 32, -18 ≤ <i>l</i> ≤ 18                  |
| refln.                                                        | 27262                                                                        | 27961                                                                        | 57785                                                                          |
| independ. reflns ( <i>R</i> <sub>int</sub> )                  | 7241 [ <i>R</i> <sub>int</sub> = 0.0371, <i>R</i> <sub>sigma</sub> = 0.0314] | 6796 [ <i>R</i> <sub>int</sub> = 0.0521, <i>R</i> <sub>sigma</sub> = 0.0388] | 10110 [ <i>R</i> <sub>int</sub> = 0.0448, <i>R</i> <sub>sigma</sub> = 0.0265]  |
| observed reflns                                               | 6345                                                                         | 6281                                                                         | 9412                                                                           |
| data/ restr./ param.                                          | 7241/0/477                                                                   | 6796/0/488                                                                   | 10110/49/603                                                                   |
| <i>R</i> 1, <i>wR</i> 2 [ <i>I</i> > 2 $\sigma$ ( <i>I</i> )] | <i>R</i> <sub>1</sub> = 0.0352, <i>wR</i> <sub>2</sub> = 0.0908              | <i>R</i> <sub>1</sub> = 0.0355, <i>wR</i> <sub>2</sub> = 0.0951              | <i>R</i> <sub>1</sub> = 0.0526, <i>wR</i> <sub>2</sub> = 0.1424                |
| <i>R</i> 1, <i>wR</i> 2 (all data)                            | <i>R</i> <sub>1</sub> = 0.0413, <i>wR</i> <sub>2</sub> = 0.0944              | <i>R</i> <sub>1</sub> = 0.0380, <i>wR</i> <sub>2</sub> = 0.0974              | <i>R</i> <sub>1</sub> = 0.0555, <i>wR</i> <sub>2</sub> = 0.1450                |
| GooF on <i>F</i> <sup>2</sup>                                 | 1.063                                                                        | 1.060                                                                        | 1.055                                                                          |
| largest diff. peak, hole/ e·Å <sup>3</sup>                    | 0.30/-0.28                                                                   | 0.26/-0.82                                                                   | 0.49/-0.24                                                                     |
| CCDC number                                                   | 2168390                                                                      | 2168389                                                                      | 2177822                                                                        |

## 4. DFT Analysis:

### (a) Theoretical method:

The geometries of the studied system were optimized at the CAM-B3LYP level<sup>7</sup> with Pople basis sets 6-31G(d,p) for all the atoms using Gaussian 16 program<sup>8</sup> suite for electronic structure and harmonic frequencies calculation. Energy decomposition analysis were performed by the Amsterdam Density Functional (ADF) program package<sup>9-10</sup> at the B3LYP-D3/TZ2P level by using Ca<sup>+2</sup> (for **2** and **3**) or Li<sub>2</sub><sup>+2</sup> (for **4**) as a **fragment1** and [L]<sup>-2</sup> (for **3**) or [(LH)(HMDS)]<sup>-2</sup> (for **2** and **4**) as a **fragment2** where relativistic effects were incorporated by the zeroth-order regular approximation (ZORA).

In the EDA method, the interaction energy ( $\Delta E_{\text{int}}$ ) between two fragments is splitted into four energy terms, viz., the electrostatic interaction energy ( $\Delta E_{\text{elstat}}$ ), the Pauli repulsion ( $\Delta E_{\text{Pauli}}$ ), the orbital interaction energy ( $\Delta E_{\text{orb}}$ ) and the dispersion energy ( $\Delta E_{\text{dis}}$ ). Thus the interaction energy can be defined as follows:

$$\Delta E_{\text{int}} = \Delta E_{\text{elstat}} + \Delta E_{\text{Pauli}} + \Delta E_{\text{orb}} + \Delta E_{\text{dis}}$$

The first term  $\Delta E_{\text{elstat}}$  is the electrostatic interactions between two fragments in their position within the molecules and it is usually attractive. The next  $\Delta E_{\text{Pauli}}$  corresponds to destabilizing interaction between the occupied orbitals of the fragments. The  $\Delta E_{\text{orb}}$  originates from the polarization and mixing of orbitals between the two fragments. Finally, the term  $\Delta E_{\text{dis}}$  is the dispersion energy between the two fragments. The results are summarized in Table S2.

**Table S2.** EDA-NOCV analyses for the metal complexes **2** to **4** at the B3LYP-D3/TZ2P-ZORA level taking  $\text{Ca}^{2+}$  or  $\text{Li}_2^{2+}$  as **fragment 1** and  $[\text{L}]^{2-}$  or  $[(\text{LH})(\text{HMDS})]^{2-}$  as **fragment 2**, respectively.

| <sup>a</sup> Energy Term                           | $\text{Ca}^{2+} + [(\text{LH})(\text{HMDS})]^{2-}$ | $\text{Ca}^{2+} + [\text{L}]^{2-}$ | $\text{Li}_2^{2+} + [(\text{LH})(\text{HMDS})]^{2-}$ |
|----------------------------------------------------|----------------------------------------------------|------------------------------------|------------------------------------------------------|
|                                                    | (2)                                                | (3)                                | (4)                                                  |
| $\Delta E_{\text{Pauli}}$                          | 69.4                                               | 57.2                               | 51.2                                                 |
| $\Delta E_{\text{elstat}}^{\text{b}}$              | -430.8 (66.9%)                                     | -400.2 (66.5%)                     | -425.6 (68.5%)                                       |
| $\Delta E_{\text{orb}}^{\text{b}}$                 | -202.7 (31.5%)                                     | -201.1 (33.4%)                     | -195.3 (31.4%)                                       |
| $\Delta E_{\text{dis}}^{\text{b}}$                 | -9.7 (0.01%)                                       | -8.2 (0.01%)                       | -7.2 (0.01%)                                         |
| $\Delta E_{\text{int}}^{\text{c}}$                 | -573.8                                             | -552.3                             | -576.9                                               |
| $\Delta E_{\text{prep}}(\text{metal})^{\text{d}}$  | 416.0 (414.8) <sup>e</sup>                         | 416.0 (414.8) <sup>e</sup>         | 392.5                                                |
| $\Delta E_{\text{prep}}(\text{ligand})^{\text{f}}$ | -29.8                                              | -25.9                              | -28.2                                                |
| $\Delta E_{\text{Total}} (= -D_e)^{\text{g}}$      | -187.6                                             | -162.2                             | -212.6                                               |

<sup>a</sup> Energy values are in kcal/mol; <sup>b</sup> Values in the parentheses indicate the percentage contribution to the total attractive interaction  $\Delta E_{\text{orb}} + \Delta E_{\text{elstat}} + \Delta E_{\text{dis}}$ ; <sup>c</sup>  $\Delta E_{\text{int}} = \Delta E_{\text{Pauli}} + \Delta E_{\text{elstat}} + \Delta E_{\text{orb}} + \Delta E_{\text{dis}}$ ; <sup>d</sup>  $\text{Ca} \rightarrow \text{Ca}^{2+}$  and  $\text{Li}_2 \rightarrow \text{Li}_2^{2+}$ ; <sup>e</sup>  $\Delta E_{\text{prep}}(\text{Ca}^{2+}; \text{experimental})^{11}$ ; <sup>f</sup> Preparation of  $[\text{L}]^{2-}$  (for **3**) and Preparation of  $[(\text{LH})(\text{HMDS})]^{2-}$  (for **2** and **4**); <sup>g</sup>  $\Delta E_{\text{Total}} (\Delta E_{\text{int}} + \Delta E_{\text{prep}}(\text{fluorenyls metal}) + \Delta E_{\text{prep}}(\text{ligand})) = -D_e$ .

## (b) Cartesian Coordinates:

Energies in Hartrees and Cartesian coordinates of calculated molecules for the favourable (indirect) pathway at the CAM-B3LYP/6-31G(d,p) level of theory:

2

Energy: -3197.546175 a.u.

|    |             |             |             |
|----|-------------|-------------|-------------|
| Ca | 1.37915700  | 0.94692100  | 9.29674300  |
| Si | 2.54703500  | -0.31461200 | 12.30945500 |
| Si | 1.67803000  | -2.47023200 | 10.39845600 |
| N  | 4.22690600  | 3.56152200  | 9.63043400  |
| N  | 3.79105400  | 0.45305400  | 6.78372300  |
| N  | 4.76215700  | 1.84209500  | 8.50641000  |
| N  | 1.94683600  | 0.29617600  | 5.73935700  |
| N  | 1.92610800  | -0.83132700 | 10.80995800 |
| C  | -0.16259200 | 2.94360500  | 7.82776800  |
| C  | -0.51229800 | 1.70942700  | 7.21238300  |
| C  | 3.26378800  | 7.98614200  | 11.99827200 |
| C  | 2.45372500  | 0.33528500  | 6.98847700  |
| C  | -0.64602100 | 2.96080400  | 9.18691400  |
| C  | 2.04025000  | 7.33505600  | 12.48699800 |
| C  | 3.75588600  | 2.34199700  | 9.28130000  |
| C  | 4.32956900  | 7.08502200  | 12.13420700 |
| C  | 0.52679600  | 4.08643900  | 7.34429300  |
| H  | 0.89617900  | 4.11072500  | 6.32251200  |
| C  | -1.26525800 | 0.97210000  | 8.17079100  |
| C  | 2.36505100  | 6.03896500  | 12.91430000 |
| C  | 2.93871400  | 0.39736100  | 4.77588800  |
| H  | 2.72545500  | 0.37182300  | 3.71925800  |

|   |             |             |             |
|---|-------------|-------------|-------------|
| C | 3.47303500  | 9.25696900  | 11.47495000 |
| H | 2.65109400  | 9.95821400  | 11.36984800 |
| C | 3.84928100  | 5.77741600  | 12.73586700 |
| H | 4.31138700  | 5.64591500  | 13.72308600 |
| C | 5.47767100  | 3.81807300  | 9.08969600  |
| H | 6.00216400  | 4.74443600  | 9.26162200  |
| C | 4.11244600  | 0.50189700  | 5.43619700  |
| H | 5.12459700  | 0.58701400  | 5.07450600  |
| C | 4.71652300  | 0.52787700  | 7.89417300  |
| H | 4.40485000  | -0.19587500 | 8.64655500  |
| H | 5.71639400  | 0.27015000  | 7.54656500  |
| C | 0.69590800  | 5.17972400  | 8.16198900  |
| H | 1.20583100  | 6.05888900  | 7.77780200  |
| C | 3.56240500  | 4.51037800  | 10.52112900 |
| H | 2.50882400  | 4.23978500  | 10.57057200 |
| H | 3.61966800  | 5.49792800  | 10.05588100 |
| C | 5.60909900  | 7.44914000  | 11.74501100 |
| H | 6.44185400  | 6.75991500  | 11.85379400 |
| C | 5.81696700  | 2.72948400  | 8.37151600  |
| H | 6.69762900  | 2.50786300  | 7.79013200  |
| C | 0.21240100  | 5.19187500  | 9.49248000  |
| H | 0.35774600  | 6.07008900  | 10.11280200 |
| C | -1.33425500 | 1.71585800  | 9.40546900  |
| C | -0.44289000 | 4.09100300  | 10.00122000 |
| H | -0.81866800 | 4.10625800  | 11.02072600 |
| C | -0.33466900 | 1.35929000  | 5.76284300  |
| H | 0.08610400  | 2.21354400  | 5.22178300  |
| H | -1.31213400 | 1.16477600  | 5.29908500  |
| C | 0.73471100  | 7.80521400  | 12.57482900 |
| H | 0.48067600  | 8.80903600  | 12.24881300 |
| C | 4.75914300  | 9.61763500  | 11.08453500 |
| H | 4.93903100  | 10.60565500 | 10.67343000 |
| C | 4.21152000  | 4.53424900  | 11.90576700 |
| H | 3.93515300  | 3.62804400  | 12.45241200 |
| H | 5.30057700  | 4.50625800  | 11.79383500 |
| C | 0.52302800  | 0.12530800  | 5.45018700  |
| H | 0.17380600  | -0.73801600 | 6.01940300  |
| H | 0.44354800  | -0.12487100 | 4.38974900  |
| C | 1.38587100  | 5.20612600  | 13.43225400 |
| H | 1.62638500  | 4.20056200  | 13.76312200 |
| C | 5.81907900  | 8.72260000  | 11.21753300 |
| H | 6.81635200  | 9.02085600  | 10.91086500 |
| C | -1.91738400 | -0.28707000 | 8.10630800  |
| H | -1.91189800 | -0.86191500 | 7.18443100  |
| C | -0.24600300 | 6.96433500  | 13.09263500 |
| H | -1.27018600 | 7.31468400  | 13.16802200 |
| C | 0.07612200  | 5.67664500  | 13.51826100 |
| H | -0.69955800 | 5.03498600  | 13.92359100 |
| C | 4.43944000  | -0.15254300 | 12.32436400 |
| H | 4.91404400  | -1.12046800 | 12.13186300 |
| H | 4.81607100  | 0.21663700  | 13.28480600 |
| H | 4.77553400  | 0.53988700  | 11.54464700 |

|   |             |             |             |
|---|-------------|-------------|-------------|
| C | 1.87405500  | 1.41474500  | 12.73308900 |
| H | 2.30333900  | 1.77629400  | 13.67443000 |
| H | 0.78521000  | 1.39473700  | 12.85274200 |
| C | -2.01415100 | 1.18614400  | 10.51857500 |
| H | -2.06871300 | 1.75450400  | 11.44371100 |
| C | 3.21622700  | -3.55801700 | 10.65359400 |
| H | 4.05768700  | -3.19719200 | 10.05169300 |
| H | 3.02654500  | -4.59830700 | 10.36712600 |
| H | 3.54285900  | -3.56020300 | 11.69881800 |
| C | 2.10268700  | -1.38403700 | 13.81190300 |
| H | 1.01876200  | -1.44761400 | 13.94861900 |
| H | 2.52886400  | -0.95858200 | 14.72723200 |
| H | 2.48243600  | -2.40632600 | 13.71908600 |
| C | -2.63003000 | -0.04334500 | 10.42221200 |
| H | -3.16291900 | -0.45417700 | 11.27327000 |
| C | 1.21327300  | -2.66693100 | 8.56950200  |
| H | 0.27055000  | -2.15662800 | 8.34193000  |
| H | 1.07634400  | -3.72666000 | 8.32760600  |
| H | 1.98175800  | -2.26562600 | 7.90199600  |
| C | -2.58216600 | -0.77104200 | 9.21043400  |
| H | -3.08521700 | -1.73171500 | 9.15164700  |
| C | 0.26374800  | -3.30803800 | 11.34596700 |
| H | 0.45249700  | -3.34207300 | 12.42259500 |
| H | 0.11103300  | -4.33746400 | 11.00261600 |
| H | -0.67468300 | -2.76441700 | 11.19286300 |
| H | 2.11314900  | 2.16360500  | 11.96888400 |

## TS1

Energy: -3197.504386 a.u.

|    |             |             |             |
|----|-------------|-------------|-------------|
| Ca | 1.20252800  | 1.13580500  | 9.38832400  |
| Si | 2.86736400  | -0.34440600 | 12.15286200 |
| Si | 1.88267400  | -2.47727800 | 10.16681100 |
| N  | 4.27867000  | 3.45531500  | 9.75614700  |
| N  | 3.49921700  | 0.12353500  | 7.25832800  |
| N  | 4.50130500  | 1.48639900  | 8.94991000  |
| N  | 1.87972400  | 0.31867900  | 5.87141900  |
| N  | 2.38103600  | -0.83035800 | 10.53662500 |
| C  | -0.29869900 | 3.10277700  | 7.91555200  |
| C  | -0.58171600 | 1.91492000  | 7.18776100  |
| C  | 3.16380400  | 8.14124000  | 11.85237900 |
| C  | 2.17002600  | 0.35585600  | 7.19024400  |
| C  | -0.85087600 | 3.00494200  | 9.24628100  |
| C  | 2.02704600  | 7.43374100  | 12.45842200 |
| C  | 3.59041800  | 2.30436000  | 9.53914800  |
| C  | 4.29473900  | 7.31573300  | 11.93326600 |
| C  | 0.40788300  | 4.28499600  | 7.56715000  |
| H  | 0.82804600  | 4.39813700  | 6.57177100  |
| C  | -1.34852600 | 1.08212600  | 8.04698800  |
| C  | 2.46793900  | 6.17593000  | 12.89530900 |
| C  | 3.00920800  | 0.03928500  | 5.11852400  |
| H  | 2.98191200  | -0.06048900 | 4.04466500  |

|   |             |             |             |
|---|-------------|-------------|-------------|
| C | 3.24650800  | 9.40134200  | 11.27123800 |
| H | 2.37402100  | 10.04419500 | 11.20866100 |
| C | 3.95115000  | 6.00935900  | 12.62419400 |
| H | 4.47781400  | 5.97215700  | 13.58752300 |
| C | 5.58998400  | 3.35562200  | 9.32299600  |
| H | 6.29601600  | 4.16585700  | 9.41609800  |
| C | 4.03637600  | -0.06889200 | 5.99587200  |
| H | 5.08374200  | -0.26748800 | 5.83183200  |
| C | 4.17332200  | 0.11020900  | 8.55995700  |
| H | 3.19209800  | -0.50734100 | 9.73223500  |
| H | 5.11995000  | -0.42180900 | 8.43642000  |
| C | 0.54127700  | 5.29831500  | 8.48611700  |
| H | 1.07300700  | 6.20391800  | 8.20791800  |
| C | 3.75610700  | 4.62270700  | 10.45631800 |
| H | 2.67076700  | 4.52463000  | 10.49280900 |
| H | 3.98754600  | 5.51485700  | 9.86775000  |
| C | 5.51281600  | 7.74510500  | 11.43042400 |
| H | 6.39479900  | 7.11404700  | 11.49277000 |
| C | 5.72454500  | 2.11446800  | 8.80357700  |
| H | 6.57235400  | 1.62777500  | 8.34807800  |
| C | -0.00107800 | 5.19424500  | 9.79089100  |
| H | 0.11956300  | 6.01251800  | 10.49216000 |
| C | -1.50794200 | 1.72853300  | 9.33214400  |
| C | -0.68493000 | 4.05891800  | 10.16704900 |
| H | -1.10884500 | 3.98536400  | 11.16555500 |
| C | -0.24292600 | 1.68870000  | 5.73812900  |
| H | 0.33301000  | 2.54322300  | 5.36816200  |
| H | -1.16142300 | 1.66843500  | 5.13366000  |
| C | 0.70566400  | 7.82520400  | 12.64252400 |
| H | 0.36201000  | 8.80036900  | 12.31177300 |
| C | 4.47108400  | 9.82710100  | 10.76571700 |
| H | 4.55202700  | 10.80707200 | 10.30677700 |
| C | 4.35495300  | 4.74028300  | 11.85788500 |
| H | 4.07071800  | 3.85886600  | 12.44202700 |
| H | 5.44737600  | 4.71703500  | 11.78232900 |
| C | 0.51790100  | 0.41091800  | 5.35129200  |
| H | -0.03142100 | -0.47495500 | 5.67929500  |
| H | 0.58914300  | 0.36004300  | 4.26208700  |
| C | 1.58825200  | 5.30021300  | 13.51138300 |
| H | 1.92088400  | 4.32465200  | 13.85382100 |
| C | 5.59508600  | 9.00684700  | 10.84318400 |
| H | 6.54266600  | 9.35434200  | 10.44463100 |
| C | -1.92928800 | -0.20340500 | 7.87162000  |
| H | -1.86139400 | -0.71051900 | 6.91403700  |
| C | -0.17452400 | 6.94235600  | 13.26190500 |
| H | -1.20933000 | 7.23182500  | 13.41290800 |
| C | 0.26144500  | 5.68980700  | 13.69090400 |
| H | -0.43688100 | 5.01447800  | 14.17460000 |
| C | 4.73036500  | -0.08262000 | 12.23764900 |
| H | 5.26329300  | -1.01675600 | 12.03435800 |
| H | 5.03067800  | 0.26139500  | 13.23275900 |
| H | 5.06651000  | 0.65724800  | 11.50685000 |

|   |             |             |             |
|---|-------------|-------------|-------------|
| C | 2.00795000  | 1.27041200  | 12.64872300 |
| H | 2.27975200  | 1.52655000  | 13.67866800 |
| H | 0.91593700  | 1.16811400  | 12.62844800 |
| C | -2.20709100 | 1.08685800  | 10.37333400 |
| H | -2.33379300 | 1.58651400  | 11.33090300 |
| C | 3.26096200  | -3.71725900 | 10.53295600 |
| H | 4.15332600  | -3.47829200 | 9.94525500  |
| H | 2.95221600  | -4.73317800 | 10.26526900 |
| H | 3.55490300  | -3.72892000 | 11.58592000 |
| C | 2.39808800  | -1.55598300 | 13.52246300 |
| H | 1.31639500  | -1.60849600 | 13.67115400 |
| H | 2.83736900  | -1.19864500 | 14.46022700 |
| H | 2.76547400  | -2.57134400 | 13.35708600 |
| C | -2.74874300 | -0.16400600 | 10.16628900 |
| H | -3.29796800 | -0.65935500 | 10.96019600 |
| C | 1.47603500  | -2.66122300 | 8.33763600  |
| H | 0.62246900  | -2.04348900 | 8.04452400  |
| H | 1.21397500  | -3.70653100 | 8.13949700  |
| H | 2.31804400  | -2.39549400 | 7.69474000  |
| C | -2.60849900 | -0.79973900 | 8.90919200  |
| H | -3.05533700 | -1.77845500 | 8.76067900  |
| C | 0.32313100  | -2.97625900 | 11.10183500 |
| H | 0.47180100  | -3.06312700 | 12.17970500 |
| H | -0.02295900 | -3.94991400 | 10.73849600 |
| H | -0.48481600 | -2.25791600 | 10.92730700 |
| H | 2.29680900  | 2.11885100  | 12.02176800 |

### Intermediate (Int)

Energy: -3197.505738 a.u.

|    |             |             |             |
|----|-------------|-------------|-------------|
| Ca | -0.61464500 | -1.37907200 | -0.67794200 |
| Si | 0.88483900  | -2.70437000 | 2.36710900  |
| Si | -0.15627000 | -4.97836400 | 0.47150300  |
| N  | 2.34901900  | 1.10610500  | -0.26629800 |
| N  | 1.56159100  | -2.16255100 | -2.85795200 |
| N  | 2.55153400  | -0.84675800 | -1.12177000 |
| N  | -0.04633200 | -1.95845100 | -4.26171500 |
| N  | 0.39343700  | -3.31923900 | 0.77906200  |
| C  | -2.20290200 | 0.65068500  | -2.05735100 |
| C  | -2.49386100 | -0.49704200 | -2.84338600 |
| C  | 1.27102500  | 5.73241500  | 1.92967800  |
| C  | 0.21571000  | -2.08280800 | -2.94334900 |
| C  | -2.70756300 | 0.46760900  | -0.71650300 |
| C  | 0.14636500  | 5.00850100  | 2.53889500  |
| C  | 1.66647700  | -0.05036600 | -0.46987100 |
| C  | 2.40926600  | 4.91516400  | 1.98890600  |
| C  | -1.53769700 | 1.86819300  | -2.36304800 |
| H  | -1.15337900 | 2.04538600  | -3.36362200 |
| C  | -3.21696700 | -1.39002100 | -2.00898300 |
| C  | 0.60256100  | 3.75021300  | 2.95818600  |
| C  | 1.12267600  | -1.97913900 | -5.00645000 |
| H  | 1.12636400  | -1.92324100 | -6.08414900 |

|   |             |             |             |
|---|-------------|-------------|-------------|
| C | 1.33776400  | 7.00052500  | 1.36415600  |
| H | 0.45948500  | 7.63688600  | 1.31845900  |
| C | 2.08280000  | 3.59589800  | 2.66364700  |
| H | 2.62538900  | 3.54276100  | 3.61722200  |
| C | 3.63758200  | 1.03017300  | -0.76772100 |
| H | 4.33907300  | 1.84638500  | -0.69134400 |
| C | 2.13931800  | -2.09565400 | -4.11736600 |
| H | 3.20524000  | -2.14821600 | -4.27439800 |
| C | 2.19213700  | -2.21592400 | -1.52942000 |
| H | 1.12776600  | -3.07800700 | 0.05223500  |
| H | 3.13407400  | -2.76208000 | -1.63882900 |
| C | -1.40253600 | 2.83582200  | -1.39644500 |
| H | -0.90442000 | 3.76946100  | -1.64249800 |
| C | 1.84322800  | 2.25352700  | 0.47625700  |
| H | 0.75994100  | 2.14902800  | 0.53990400  |
| H | 2.05535800  | 3.15993000  | -0.09766300 |
| C | 3.61879900  | 5.36098500  | 1.47983300  |
| H | 4.50624300  | 4.73617000  | 1.52505400  |
| C | 3.75787400  | -0.19943200 | -1.31881200 |
| H | 4.58759500  | -0.66680500 | -1.82529800 |
| C | -1.90077100 | 2.64943300  | -0.08322000 |
| H | -1.78198000 | 3.43484600  | 0.65516000  |
| C | -3.34115000 | -0.82323600 | -0.68308100 |
| C | -2.54104300 | 1.47666400  | 0.25291400  |
| H | -2.93265900 | 1.33948600  | 1.25803900  |
| C | -2.19722700 | -0.63853900 | -4.31299100 |
| H | -1.66081200 | 0.25255000  | -4.65543900 |
| H | -3.13317700 | -0.65928000 | -4.89005300 |
| C | -1.17640700 | 5.38658800  | 2.74037300  |
| H | -1.53201500 | 6.36157100  | 2.42198900  |
| C | 2.55391300  | 7.44295800  | 0.85264500  |
| H | 2.62249000  | 8.42950700  | 0.40593300  |
| C | 2.47689700  | 2.34365500  | 1.86408000  |
| H | 2.20997800  | 1.44896500  | 2.43632800  |
| H | 3.56740400  | 2.32809900  | 1.76202100  |
| C | -1.40542100 | -1.87055400 | -4.78511300 |
| H | -1.93167100 | -2.78811600 | -4.51305700 |
| H | -1.33276200 | -1.85040200 | -5.87531500 |
| C | -0.26289900 | 2.86193000  | 3.57633300  |
| H | 0.08153700  | 1.88599900  | 3.90502700  |
| C | 3.68522000  | 6.63103800  | 0.90870200  |
| H | 4.62610600  | 6.99155800  | 0.50586400  |
| C | -3.78948800 | -2.66961300 | -2.24237200 |
| H | -3.74530800 | -3.11797100 | -3.23032300 |
| C | -2.04213500 | 4.49086000  | 3.36151300  |
| H | -3.07778700 | 4.76980800  | 3.52589600  |
| C | -1.59062700 | 3.23855200  | 3.77485700  |
| H | -2.27778300 | 2.55274600  | 4.25977900  |
| C | 2.73831200  | -2.39981700 | 2.36420800  |
| H | 3.28939400  | -3.33557900 | 2.23024200  |
| H | 3.06251700  | -1.95352800 | 3.30977100  |
| H | 3.02397400  | -1.72410300 | 1.55357000  |

|   |             |             |             |
|---|-------------|-------------|-------------|
| C | -0.01636900 | -1.08759700 | 2.73329100  |
| H | 0.23357000  | -0.74156300 | 3.74193500  |
| H | -1.10385700 | -1.21951900 | 2.69717600  |
| C | -4.00185000 | -1.53302200 | 0.33875700  |
| H | -4.10438000 | -1.09192400 | 1.32759600  |
| C | 1.20366000  | -6.22454600 | 0.85989600  |
| H | 2.09001600  | -6.02848200 | 0.24824200  |
| H | 0.86878300  | -7.24315900 | 0.63832900  |
| H | 1.51316200  | -6.19980300 | 1.90815500  |
| C | 0.45466800  | -3.86442900 | 3.78528600  |
| H | -0.62376300 | -3.94058700 | 3.94430800  |
| H | 0.88941300  | -3.45499800 | 4.70340000  |
| H | 0.85229700  | -4.87402900 | 3.65867100  |
| C | -4.53933700 | -2.77512100 | 0.07390800  |
| H | -5.06114600 | -3.32160000 | 0.85275600  |
| C | -0.58719700 | -5.15604600 | -1.34731300 |
| H | -1.48823600 | -4.59277600 | -1.60833300 |
| H | -0.77818700 | -6.21050800 | -1.57377100 |
| H | 0.22182300  | -4.80765400 | -1.99361100 |
| C | -4.43164000 | -3.33390200 | -1.22247800 |
| H | -4.87410600 | -4.30686100 | -1.41568400 |
| C | -1.69839400 | -5.36747100 | 1.47278200  |
| H | -1.50911100 | -5.45891100 | 2.54382600  |
| H | -2.11537400 | -6.32069000 | 1.13104300  |
| H | -2.46726700 | -4.60307100 | 1.32270700  |
| H | 0.26260800  | -0.29002800 | 2.03800500  |

### Rearranged Intermediate

Energy: -3197.512772 a.u.

|    |             |             |             |
|----|-------------|-------------|-------------|
| Ca | -0.34784800 | -0.80161900 | -1.14405000 |
| Si | -0.71125900 | -1.16210600 | 2.45069400  |
| Si | -1.91219100 | -3.66624500 | 0.94327000  |
| N  | 2.58605500  | 1.53649900  | -0.61812900 |
| N  | 2.65389300  | -2.48937600 | -1.96000200 |
| N  | 3.20633800  | -0.49615200 | -0.70726300 |
| N  | 1.27092000  | -3.05994500 | -3.47042800 |
| N  | -0.74503600 | -2.31073200 | 1.05262200  |
| C  | -0.67464100 | 0.36400700  | -3.75089000 |
| C  | -1.10687100 | -0.98708300 | -3.89995200 |
| C  | 0.43860200  | 2.85535700  | 3.88482500  |
| C  | 1.32269600  | -2.51625100 | -2.23582200 |
| C  | -1.59728100 | 1.07527900  | -2.90283300 |
| C  | 1.77176700  | 2.39490600  | 4.15732800  |
| C  | 2.08554200  | 0.28323100  | -0.64073500 |
| C  | 0.43653800  | 3.36152900  | 2.53516600  |
| C  | 0.42485600  | 1.07566300  | -4.29733000 |
| H  | 1.13690700  | 0.57088700  | -4.94448100 |
| C  | -2.34812500 | -1.09545200 | -3.20864500 |
| C  | 2.54949300  | 2.62033300  | 2.96362100  |
| C  | 2.53332300  | -3.35152200 | -3.96137900 |
| H  | 2.68914300  | -3.80174200 | -4.92861600 |



|   |             |             |             |
|---|-------------|-------------|-------------|
| C | -0.72578400 | 2.89588000  | 4.65710800  |
| H | -0.71733600 | 2.51477000  | 5.67672100  |
| C | 1.72699300  | 3.20787500  | 1.96943600  |
| C | 3.96822200  | 1.54622600  | -0.68279200 |
| H | 4.54263400  | 2.45764400  | -0.67731900 |
| C | 3.41441900  | -2.98698800 | -3.00539300 |
| H | 4.48999800  | -3.05370200 | -2.96976100 |
| C | 3.17704200  | -1.94281800 | -0.72398000 |
| H | 0.18030700  | -2.74319500 | 1.01405400  |
| H | 4.19041000  | -2.31307400 | -0.57362500 |
| C | 0.55809900  | 2.42128900  | -4.04521100 |
| H | 1.38439900  | 2.96782300  | -4.49051500 |
| C | 1.79533500  | 2.77021000  | -0.57117300 |
| H | 0.74853100  | 2.47132800  | -0.53569200 |
| H | 1.95369300  | 3.29226300  | -1.51922100 |
| C | -0.76124500 | 3.91953800  | 2.02900400  |
| H | -0.79277300 | 4.33180700  | 1.02205700  |
| C | 4.36587100  | 0.25943700  | -0.74004300 |
| H | 5.34975600  | -0.17920600 | -0.78550700 |
| C | -0.36339700 | 3.11644100  | -3.22643900 |
| H | -0.23044200 | 4.17914300  | -3.05322100 |
| C | -2.64571300 | 0.15299400  | -2.55081700 |
| C | -1.42075600 | 2.44988500  | -2.64949500 |
| H | -2.13313200 | 2.98547600  | -2.02752300 |
| C | -0.54180000 | -2.00505000 | -4.84832500 |
| H | 0.23759700  | -1.54888400 | -5.46787300 |
| H | -1.32068800 | -2.34027600 | -5.54716400 |
| C | 2.36074600  | 1.82946400  | 5.29290100  |
| H | 1.76668600  | 1.66775900  | 6.19051900  |
| C | -1.89008400 | 3.43573800  | 4.13077800  |
| H | -2.79424000 | 3.47714000  | 4.73079200  |
| C | 2.13609000  | 3.68681700  | 0.61418200  |
| H | 3.21063800  | 3.90931100  | 0.59024200  |
| H | 1.64248200  | 4.64168500  | 0.38439500  |
| C | 0.03247200  | -3.28049400 | -4.21599600 |
| H | -0.68892100 | -3.72872000 | -3.53137900 |
| H | 0.25461200  | -4.01814100 | -4.99057800 |
| C | 3.91738400  | 2.25818700  | 2.98222100  |
| H | 4.53841400  | 2.41603700  | 2.10338400  |
| C | -1.89419600 | 3.95333700  | 2.81867300  |
| H | -2.80863500 | 4.38986100  | 2.42405600  |
| C | -3.29847300 | -2.14624100 | -3.12237300 |
| H | -3.12743100 | -3.08415100 | -3.64380700 |
| C | 3.70122200  | 1.48019000  | 5.27899100  |
| H | 4.16322300  | 1.04358000  | 6.15933200  |
| C | 4.47093500  | 1.70225900  | 4.11843700  |
| H | 5.52421700  | 1.43141700  | 4.12155000  |
| C | 1.10379600  | -0.86965100 | 2.78286300  |
| H | 1.59358800  | -1.79573400 | 3.10373900  |
| H | 1.24268700  | -0.12392500 | 3.57046000  |
| H | 1.62404400  | -0.48747300 | 1.90063900  |
| C | -1.63671800 | 0.36701000  | 1.89308100  |

|   |             |             |             |
|---|-------------|-------------|-------------|
| H | -1.87344900 | 1.01155400  | 2.74483500  |
| H | -2.57753700 | 0.10493800  | 1.39603000  |
| C | -3.83643100 | 0.30449100  | -1.81472700 |
| H | -4.06035400 | 1.25113800  | -1.33001200 |
| C | -1.56035100 | -4.95298800 | 2.26888900  |
| H | -0.51866700 | -5.28814100 | 2.23315600  |
| H | -2.19090300 | -5.83361600 | 2.10894900  |
| H | -1.75837800 | -4.58241700 | 3.27659300  |
| C | -1.50321300 | -1.83488100 | 4.01568200  |
| H | -2.55461700 | -2.10834800 | 3.90162700  |
| H | -1.45348800 | -1.04871300 | 4.77633600  |
| H | -0.96318500 | -2.70146700 | 4.40597800  |
| C | -4.73529300 | -0.73892300 | -1.74908200 |
| H | -5.66411700 | -0.62348000 | -1.20048800 |
| C | -1.67954800 | -4.49600300 | -0.72465700 |
| H | -2.04247500 | -3.86062700 | -1.53629800 |
| H | -2.24417500 | -5.43307300 | -0.76095200 |
| H | -0.62798700 | -4.73291300 | -0.91418300 |
| C | -4.46397100 | -1.95718400 | -2.41512900 |
| H | -5.19585200 | -2.75816500 | -2.36841500 |
| C | -3.65103000 | -2.99556200 | 1.11110800  |
| H | -3.83485100 | -2.54733700 | 2.09039400  |
| H | -4.36964000 | -3.81206700 | 0.98674100  |
| H | -3.87147800 | -2.24739200 | 0.34546400  |
| H | -1.04557800 | 1.00357200  | 1.22567500  |
| H | 2.55682300  | -2.29670800 | 0.09817300  |

## TS 2

Energy: -3197.511720 a.u.

|    |             |             |             |
|----|-------------|-------------|-------------|
| Ca | -0.47329700 | -0.21616500 | -0.04309700 |
| Si | 1.49090400  | -2.93076500 | 1.79574500  |
| Si | 3.17981900  | -1.71664100 | -0.49703400 |
| N  | -1.33005000 | 3.12198400  | -0.85654000 |
| N  | -0.25020000 | 0.13772100  | -3.65737800 |
| N  | -0.48198700 | 2.32638300  | -2.63472700 |
| N  | -0.81522500 | -1.87390900 | -3.27045800 |
| N  | 1.82458100  | -1.56586800 | 0.67321800  |
| C  | -3.25914000 | -0.69830200 | -1.05434700 |
| C  | -2.66038500 | -1.97526300 | -0.80763100 |
| C  | 2.13329900  | 1.14909100  | 2.87413100  |
| C  | -0.26283900 | -0.79977500 | -2.66598000 |
| C  | -3.62281400 | -0.08606900 | 0.19146400  |
| C  | 2.75066900  | 1.64748100  | 1.66472200  |
| C  | -0.81339600 | 1.98657900  | -1.36325600 |
| C  | 0.75019100  | 1.50634800  | 2.82072200  |
| C  | -3.59384900 | -0.03278000 | -2.25726500 |
| H  | -3.34076400 | -0.47422200 | -3.21689100 |
| C  | -2.76893300 | -2.19827400 | 0.60456800  |
| C  | 1.72750200  | 2.29126400  | 0.90105900  |
| C  | -1.15478300 | -1.62050700 | -4.58876400 |
| H  | -1.60567100 | -2.36375300 | -5.22661500 |

|   |             |             |             |
|---|-------------|-------------|-------------|
| C | 2.67756500  | 0.55253600  | 4.01688400  |
| H | 3.73433600  | 0.29787300  | 4.05130600  |
| C | 0.44581000  | 2.15660900  | 1.56083400  |
| C | -1.31389600 | 4.15501200  | -1.77523400 |
| H | -1.69781800 | 5.13753700  | -1.55253200 |
| C | -0.79645200 | -0.34344000 | -4.83682300 |
| H | -0.86475700 | 0.24907800  | -5.73512600 |
| C | 0.30764100  | 1.46261700  | -3.49381800 |
| H | 2.06025000  | -0.76185000 | 1.27091700  |
| H | 0.37938800  | 1.92982400  | -4.47644700 |
| C | -4.28229800 | 1.15932200  | -2.21147600 |
| H | -4.56011100 | 1.65197200  | -3.13911100 |
| C | -1.73259200 | 3.23504000  | 0.54375900  |
| H | -2.36985600 | 2.38089800  | 0.76400400  |
| H | -2.35228600 | 4.13213900  | 0.63149000  |
| C | -0.04377700 | 1.27543900  | 3.96065500  |
| H | -1.09485000 | 1.55260900  | 3.96342700  |
| C | -0.77248400 | 3.65468200  | -2.90782000 |
| H | -0.58373900 | 4.11341300  | -3.86527900 |
| C | -4.65694700 | 1.74466000  | -0.98394500 |
| H | -5.22039300 | 2.67226000  | -0.97982200 |
| C | -3.28516600 | -1.01600200 | 1.23947500  |
| C | -4.33340300 | 1.12491100  | 0.20532800  |
| H | -4.65445500 | 1.55536100  | 1.15090700  |
| C | -2.49048900 | -3.04830900 | -1.84637800 |
| H | -3.26835300 | -2.94882700 | -2.61562300 |
| H | -2.64710100 | -4.03405200 | -1.39183400 |
| C | 4.08750900  | 1.69980400  | 1.26001200  |
| H | 4.85840500  | 1.22189800  | 1.85869300  |
| C | 1.87449500  | 0.33983000  | 5.12464800  |
| H | 2.29019800  | -0.10365500 | 6.02357500  |
| C | -0.55154000 | 3.30437800  | 1.51276800  |
| H | -0.01110100 | 4.24041900  | 1.31179700  |
| H | -0.99596200 | 3.42874000  | 2.50758800  |
| C | -1.13319300 | -3.10839000 | -2.56101800 |
| H | -0.32832300 | -3.28237700 | -1.84589300 |
| H | -1.11307000 | -3.92418600 | -3.28995100 |
| C | 2.10970800  | 3.02022800  | -0.24384900 |
| H | 1.37122700  | 3.57793200  | -0.81244200 |
| C | 0.51951000  | 0.71312500  | 5.09094900  |
| H | -0.09743500 | 0.55187600  | 5.97013000  |
| C | -2.59347500 | -3.35880700 | 1.39662900  |
| H | -2.27071900 | -4.29000200 | 0.94156500  |
| C | 4.43415400  | 2.40976900  | 0.12182700  |
| H | 5.47267100  | 2.47230800  | -0.18725900 |
| C | 3.44313800  | 3.07808300  | -0.61433200 |
| H | 3.73078300  | 3.66157600  | -1.48488100 |
| C | 3.05377300  | -3.56290800 | 2.63383400  |
| H | 2.79289700  | -4.38799800 | 3.30501600  |
| H | 3.51982800  | -2.78313300 | 3.24291300  |
| H | 3.80236000  | -3.93653900 | 1.93026400  |
| C | 0.34301400  | -2.28885600 | 3.11399600  |

|   |             |             |             |
|---|-------------|-------------|-------------|
| H | 0.05479600  | -3.10814400 | 3.78005500  |
| H | -0.59199300 | -1.87631300 | 2.72834900  |
| C | -3.52438100 | -0.99533200 | 2.62434700  |
| H | -3.91285000 | -0.09641400 | 3.09614300  |
| C | 4.84985600  | -1.59639000 | 0.38032300  |
| H | 4.75118700  | -1.54707900 | 1.46647100  |
| H | 5.38111800  | -0.69694100 | 0.06100900  |
| H | 5.47860900  | -2.46139600 | 0.14702100  |
| C | 0.71289000  | -4.35850100 | 0.85361000  |
| H | -0.11160900 | -4.02623200 | 0.22083900  |
| H | 0.29404300  | -5.06588200 | 1.57623600  |
| H | 1.42719100  | -4.90262100 | 0.23392500  |
| C | -3.32186400 | -2.13717500 | 3.36997300  |
| H | -3.52099500 | -2.13512700 | 4.43626100  |
| C | 3.08827200  | -0.38248300 | -1.80528400 |
| H | 2.27907100  | -0.59416800 | -2.50633700 |
| H | 4.03075700  | -0.36130100 | -2.36255400 |
| H | 2.94461500  | 0.61002400  | -1.37086400 |
| C | -2.88217400 | -3.32151800 | 2.74232400  |
| H | -2.76405200 | -4.22242700 | 3.33753700  |
| C | 3.08341800  | -3.37531800 | -1.38052800 |
| H | 3.32793300  | -4.22293400 | -0.73622600 |
| H | 3.81793000  | -3.36532200 | -2.19300000 |
| H | 2.10366300  | -3.55728800 | -1.82990300 |
| H | 0.83160400  | -1.52438000 | 3.72052600  |
| H | 1.31103700  | 1.36994800  | -3.07638600 |

### 3

Energy: -3197.532505 a.u.

|    |             |             |             |
|----|-------------|-------------|-------------|
| Ca | -1.00333100 | 0.06883500  | 0.91249700  |
| Si | 3.22882400  | -4.09680000 | 0.90946800  |
| Si | 4.32309800  | -2.81059800 | -1.78560000 |
| N  | -0.93446400 | 3.50309700  | -0.44541500 |
| N  | 0.36080100  | -0.13254800 | -2.35347000 |
| N  | 0.14889700  | 2.21684900  | -1.75165100 |
| N  | -0.55791900 | -2.01391000 | -1.98194700 |
| N  | 3.19379200  | -3.02786300 | -0.47075100 |
| C  | -3.45932700 | -0.40443700 | -0.50697700 |
| C  | -3.01753400 | -1.70425600 | -0.11983500 |
| C  | 1.47241300  | 1.05863400  | 2.23177700  |
| C  | -0.03208000 | -0.94946600 | -1.33733900 |
| C  | -3.88186300 | 0.32776400  | 0.65944900  |
| C  | 2.40955800  | 1.74594900  | 1.39422900  |
| C  | -0.53815600 | 2.21665700  | -0.57641200 |
| C  | 0.42834300  | 2.01643200  | 2.56886900  |
| C  | -3.54829900 | 0.22964400  | -1.77209400 |
| H  | -3.24074500 | -0.29908000 | -2.67042700 |
| C  | -3.21922900 | -1.80097800 | 1.28866200  |
| C  | 1.91437900  | 3.08171500  | 1.22149000  |
| C  | -0.51285600 | -1.86669700 | -3.35762000 |
| H  | -0.87931400 | -2.62098000 | -4.03543700 |

|   |             |             |             |
|---|-------------|-------------|-------------|
| C | 1.40149500  | -0.26040200 | 2.68775800  |
| H | 2.18549700  | -0.96732900 | 2.42903800  |
| C | 0.69512700  | 3.24406300  | 1.94032000  |
| C | -0.49441900 | 4.29085000  | -1.49750300 |
| H | -0.71506000 | 5.34421700  | -1.56410800 |
| C | 0.07084600  | -0.67211000 | -3.59566500 |
| H | 0.32010400  | -0.17680300 | -4.52044100 |
| C | 1.03461400  | 1.13096500  | -2.14071600 |
| H | 2.38548200  | -2.41461600 | -0.50973500 |
| H | 1.53592500  | 1.41582000  | -3.06488800 |
| C | -4.04137900 | 1.51134300  | -1.86013900 |
| H | -4.12090700 | 1.98720900  | -2.83343800 |
| C | -1.43357100 | 4.04369500  | 0.81283200  |
| H | -2.10173900 | 3.29827100  | 1.24485800  |
| H | -2.03144100 | 4.93261100  | 0.59423100  |
| C | -0.65713200 | 1.56075200  | 3.36600400  |
| H | -1.45577800 | 2.24245500  | 3.64689600  |
| C | 0.19163200  | 3.47919600  | -2.32695300 |
| H | 0.69569900  | 3.67963400  | -3.25878600 |
| C | -4.45050800 | 2.22608000  | -0.71062700 |
| H | -4.83627900 | 3.23496300  | -0.81564800 |
| C | -3.74156600 | -0.55505700 | 1.78815300  |
| C | -4.37003400 | 1.64207500  | 0.53533200  |
| H | -4.70231100 | 2.18463700  | 1.41713200  |
| C | -2.70307700 | -2.84888500 | -1.03901500 |
| H | -3.19436200 | -2.69619100 | -2.00750300 |
| H | -3.12389300 | -3.77747800 | -0.63344300 |
| C | 3.59942700  | 1.33242600  | 0.77879800  |
| H | 3.97174700  | 0.32137200  | 0.92870500  |
| C | 0.31609400  | -0.67938000 | 3.45442300  |
| H | 0.25691400  | -1.70164400 | 3.81088100  |
| C | -0.27334300 | 4.37538500  | 1.78534000  |
| H | 0.24408000  | 5.26830000  | 1.41803700  |
| H | -0.73299700 | 4.66292600  | 2.73943600  |
| C | -1.21517900 | -3.12183200 | -1.29777600 |
| H | -0.68544900 | -3.28222200 | -0.35785600 |
| H | -1.08562400 | -4.01627900 | -1.91299000 |
| C | 2.65115000  | 3.96557300  | 0.39984400  |
| H | 2.30585400  | 4.98337300  | 0.24063900  |
| C | -0.69819700 | 0.24559200  | 3.80168200  |
| H | -1.53720400 | -0.09369000 | 4.39818800  |
| C | -3.03023000 | -2.87085600 | 2.20127200  |
| H | -2.64258200 | -3.82488900 | 1.85346500  |
| C | 4.29760000  | 2.22019100  | -0.01817000 |
| H | 5.22494000  | 1.91551200  | -0.49306300 |
| C | 3.81472100  | 3.53493900  | -0.20147500 |
| H | 4.37867300  | 4.22195100  | -0.82653900 |
| C | 4.35428300  | -3.45386800 | 2.27495400  |
| H | 5.38360400  | -3.34849200 | 1.91929200  |
| H | 4.36721200  | -4.13659200 | 3.13091500  |
| H | 4.03145500  | -2.47330700 | 2.63791300  |
| C | 1.47419200  | -4.23650300 | 1.57459400  |

|   |             |             |             |
|---|-------------|-------------|-------------|
| H | 1.45473000  | -4.81723400 | 2.50201500  |
| H | 0.81833800  | -4.73729400 | 0.85613400  |
| C | -4.08380900 | -0.42254900 | 3.14576300  |
| H | -4.50160900 | 0.51146100  | 3.51315500  |
| C | 6.08725500  | -2.82351000 | -1.13320500 |
| H | 6.24762700  | -2.01205800 | -0.41734300 |
| H | 6.80359000  | -2.69676800 | -1.95115600 |
| H | 6.33258800  | -3.76377800 | -0.62996900 |
| C | 3.84469800  | -5.79757900 | 0.39248500  |
| H | 3.19464400  | -6.23968200 | -0.36806000 |
| H | 3.86702100  | -6.47595900 | 1.25129000  |
| H | 4.85879200  | -5.76050200 | -0.01702300 |
| C | -3.90798400 | -1.48798700 | 4.00264100  |
| H | -4.18169200 | -1.39701700 | 5.04879900  |
| C | 3.95422200  | -1.15537500 | -2.59747600 |
| H | 2.94874500  | -1.14730700 | -3.03012800 |
| H | 4.66159800  | -0.95905900 | -3.40930700 |
| H | 4.02663600  | -0.32978600 | -1.88285200 |
| C | -3.37571300 | -2.70793000 | 3.52359900  |
| H | -3.24845000 | -3.53616200 | 4.21470500  |
| C | 4.15460000  | -4.16611100 | -3.08244000 |
| H | 4.35095200  | -5.15389200 | -2.65514100 |
| H | 4.85823800  | -4.01561800 | -3.90781300 |
| H | 3.14439700  | -4.18295800 | -3.50317500 |
| H | 1.04791600  | -3.25258700 | 1.79620200  |
| H | 1.78712500  | 0.99715400  | -1.36325000 |

**Energies in Hartrees and Cartesian coordinates of calculated molecules for the unfavourable (direct) pathway at the CAM-B3LYP/6-31G(d,p) level of theory:**

**TS 1<sub>d</sub>**

**Energy:** -3197.467329 a.u.

|    |             |             |             |
|----|-------------|-------------|-------------|
| Ca | 1.56509200  | 1.37694200  | 9.03812900  |
| Si | 1.71409500  | 0.74560700  | 12.85423600 |
| Si | 4.15230800  | 0.21660800  | 11.21970500 |
| N  | 3.69792900  | 4.11410200  | 7.81324300  |
| N  | 2.85616600  | 0.43449300  | 5.75994900  |
| N  | 3.92685900  | 2.52932800  | 6.40717800  |
| N  | 1.07685600  | -0.66546600 | 6.12974400  |
| N  | 2.70412200  | 1.18397100  | 11.45688100 |
| C  | -0.48799800 | 2.32868400  | 7.30227000  |
| C  | -0.97807000 | 1.05485500  | 7.73973700  |
| C  | 4.07574000  | 5.01987300  | 13.44966900 |
| C  | 2.05338300  | 0.00656100  | 6.77725400  |
| C  | -0.77012100 | 3.32347500  | 8.30485100  |
| C  | 2.64019200  | 5.24205000  | 13.53871200 |
| C  | 3.34961000  | 2.82465300  | 7.60054200  |
| C  | 4.33397600  | 4.33216600  | 12.23560000 |
| C  | 0.15759600  | 2.74189500  | 6.11116700  |
| H  | 0.35752100  | 2.02417900  | 5.32034500  |
| C  | -1.67728500 | 1.30129100  | 8.96895700  |

|   |             |             |             |
|---|-------------|-------------|-------------|
| C | 2.04701600  | 4.67780500  | 12.38326700 |
| C | 1.24660100  | -0.65097200 | 4.75578400  |
| H | 0.56413500  | -1.14115200 | 4.08016100  |
| C | 5.11515400  | 5.40323000  | 14.29293800 |
| H | 4.90444200  | 5.91864300  | 15.22605200 |
| C | 3.06291800  | 3.96747200  | 11.59185200 |
| H | 2.91010400  | 2.51203700  | 11.70771000 |
| C | 4.45684600  | 4.62017500  | 6.77092700  |
| H | 4.81891900  | 5.63585800  | 6.75609200  |
| C | 2.37768500  | 0.04534300  | 4.51906100  |
| H | 2.88828900  | 0.27542600  | 3.59763400  |
| C | 4.09377500  | 1.15865800  | 5.94986600  |
| H | 4.70263600  | 0.61796900  | 6.67542800  |
| H | 4.62770100  | 1.18036200  | 5.00065800  |
| C | 0.51101900  | 4.06479900  | 5.94476000  |
| H | 0.99446300  | 4.37515100  | 5.02255000  |
| C | 3.44587100  | 4.83170200  | 9.08083200  |
| H | 2.73655400  | 5.64241500  | 8.90094400  |
| H | 4.39435600  | 5.26371500  | 9.40850200  |
| C | 5.66273900  | 4.10987900  | 11.86141700 |
| H | 5.89858100  | 3.64653200  | 10.90968100 |
| C | 4.61252100  | 3.61579500  | 5.88172000  |
| H | 5.14457300  | 3.57668000  | 4.94441400  |
| C | 0.26419100  | 5.02527400  | 6.94750700  |
| H | 0.55884500  | 6.05775300  | 6.78899100  |
| C | -1.54677600 | 2.68042900  | 9.33601200  |
| C | -0.37341400 | 4.65764100  | 8.11690000  |
| H | -0.59216400 | 5.40250200  | 8.87795300  |
| C | -1.23093600 | -0.14514900 | 6.86664900  |
| H | -1.46024600 | 0.17221200  | 5.84017400  |
| H | -2.12647600 | -0.66793000 | 7.22214200  |
| C | 1.86801300  | 5.90845700  | 14.48853000 |
| H | 2.33006700  | 6.33081700  | 15.37673800 |
| C | 6.42760700  | 5.14200900  | 13.91974600 |
| H | 7.24677900  | 5.44257600  | 14.56516800 |
| C | 2.92628300  | 3.81946400  | 10.09826700 |
| H | 1.85653900  | 3.68572300  | 9.88608600  |
| H | 3.44332000  | 2.89583600  | 9.84283800  |
| C | -0.11498900 | -1.19320700 | 6.78571000  |
| H | 0.17821000  | -1.52843000 | 7.78252900  |
| H | -0.44261300 | -2.06962600 | 6.21981200  |
| C | 0.67448900  | 4.84142800  | 12.17833400 |
| H | 0.19361400  | 4.43794700  | 11.29225100 |
| C | 6.69534500  | 4.51185100  | 12.70162900 |
| H | 7.72512300  | 4.33913600  | 12.40266800 |
| C | -2.49333000 | 0.46369000  | 9.76394800  |
| H | -2.62109200 | -0.58481300 | 9.50683900  |
| C | 0.50252600  | 6.04649400  | 14.27786900 |
| H | -0.10962200 | 6.57022500  | 15.00512900 |
| C | -0.08501500 | 5.52217200  | 13.12169100 |
| H | -1.15172400 | 5.64797700  | 12.95947600 |
| C | 2.38436200  | 1.51822800  | 14.43888000 |

|   |             |             |             |
|---|-------------|-------------|-------------|
| H | 3.39215400  | 1.16861100  | 14.67737200 |
| H | 1.73574600  | 1.26267100  | 15.28380600 |
| H | 2.41844400  | 2.60827500  | 14.36479300 |
| C | -0.05535300 | 1.32130400  | 12.63891500 |
| H | -0.63631700 | 1.04351000  | 13.52540800 |
| H | -0.55211100 | 0.86278600  | 11.77894300 |
| C | -2.23087800 | 3.18784500  | 10.45058200 |
| H | -2.15397800 | 4.24166200  | 10.70558700 |
| C | 5.20890200  | -0.00719700 | 12.76773100 |
| H | 5.50652300  | 0.96370100  | 13.17521100 |
| H | 6.12296300  | -0.55610600 | 12.51739300 |
| H | 4.69901700  | -0.56040400 | 13.56039700 |
| C | 1.58704600  | -1.11994000 | 13.16341800 |
| H | 1.12264000  | -1.64899700 | 12.32538300 |
| H | 0.94366200  | -1.27175400 | 14.03697700 |
| H | 2.54329700  | -1.60312500 | 13.37820000 |
| C | -3.03906000 | 2.35264000  | 11.19501600 |
| H | -3.58196800 | 2.74040800  | 12.05065200 |
| C | 5.32528300  | 0.93003000  | 9.91684700  |
| H | 4.82890400  | 1.23590800  | 8.99184300  |
| H | 6.05063600  | 0.15014300  | 9.65976400  |
| H | 5.88879900  | 1.78585100  | 10.28940900 |
| C | -3.16483900 | 0.99271000  | 10.84622400 |
| H | -3.80841700 | 0.35077000  | 11.44100600 |
| C | 3.74665500  | -1.50207200 | 10.52275600 |
| H | 3.05915600  | -2.07858600 | 11.14271500 |
| H | 4.67338200  | -2.07937700 | 10.43028100 |
| H | 3.31657500  | -1.43667800 | 9.51598100  |
| H | -0.13265000 | 2.40365100  | 12.52951000 |

### Intermediate (Int<sub>d</sub>)

Energy: -3197.505792 a.u.

|    |             |             |             |
|----|-------------|-------------|-------------|
| Ca | 1.54376500  | 1.41367800  | 9.09250200  |
| Si | 2.23010100  | 0.53515300  | 12.80624500 |
| Si | 4.31324000  | -0.55523200 | 10.71186200 |
| N  | 3.39076200  | 4.35542900  | 7.93027200  |
| N  | 2.95925900  | 0.56785400  | 5.89560300  |
| N  | 3.83008100  | 2.73208300  | 6.62403300  |
| N  | 1.28973500  | -0.71204700 | 6.19256700  |
| N  | 3.11234700  | 0.66593200  | 11.23568600 |
| C  | -0.57757800 | 2.08468700  | 7.27375300  |
| C  | -0.89987200 | 0.77762400  | 7.74869800  |
| C  | 3.44034600  | 5.63283500  | 13.74401400 |
| C  | 2.14518200  | 0.08162300  | 6.87190100  |
| C  | -0.75502300 | 3.03988700  | 8.33567400  |
| C  | 2.20354000  | 6.33073800  | 13.51489600 |
| C  | 3.25367300  | 3.01710900  | 7.82877700  |
| C  | 3.71249700  | 4.85877100  | 12.55951100 |
| C  | -0.14835500 | 2.55456500  | 6.00638000  |
| H  | -0.00960500 | 1.85819500  | 5.18373700  |
| C  | -1.33703600 | 0.93011600  | 9.09801000  |



|   |             |             |             |
|---|-------------|-------------|-------------|
| C | 1.74422600  | 5.96246100  | 12.20172500 |
| C | 1.54423100  | -0.71322000 | 4.83163100  |
| H | 0.96273400  | -1.29183900 | 4.13188500  |
| C | 4.31080500  | 5.58288500  | 14.83377500 |
| H | 4.10055300  | 6.16977600  | 15.72546400 |
| C | 2.67176700  | 5.06139000  | 11.61912300 |
| H | 3.61051100  | 1.55944600  | 11.28595200 |
| C | 4.02027500  | 4.89837800  | 6.82361800  |
| H | 4.21390900  | 5.95499800  | 6.73084000  |
| C | 2.60695700  | 0.09701300  | 4.64077300  |
| H | 3.14489000  | 0.36084600  | 3.74432600  |
| C | 4.12291100  | 1.38660200  | 6.16541100  |
| H | 4.73082400  | 0.88157600  | 6.91492000  |
| H | 4.70525500  | 1.46378700  | 5.24838400  |
| C | 0.07106600  | 3.89984500  | 5.81567800  |
| H | 0.38398700  | 4.25670800  | 4.83849000  |
| C | 3.04068600  | 5.17630000  | 9.10338700  |
| H | 2.27729300  | 5.89799200  | 8.80269800  |
| H | 3.93904400  | 5.73068500  | 9.38345500  |
| C | 4.87827200  | 4.05795300  | 12.53198900 |
| H | 5.14072900  | 3.49066000  | 11.63917900 |
| C | 4.30341600  | 3.87254400  | 5.99537600  |
| H | 4.79942800  | 3.85043300  | 5.03818800  |
| C | -0.11035800 | 4.83344800  | 6.86213700  |
| H | 0.06193700  | 5.88859500  | 6.67632700  |
| C | -1.24280100 | 2.31542000  | 9.48185200  |
| C | -0.51942800 | 4.40921100  | 8.10775600  |
| H | -0.68176300 | 5.12830400  | 8.90577600  |
| C | -1.07143700 | -0.45551100 | 6.91035200  |
| H | -1.36600000 | -0.17773400 | 5.89076000  |
| H | -1.89512700 | -1.06205300 | 7.30546900  |
| C | 1.45547300  | 7.20799500  | 14.30411900 |
| H | 1.80821800  | 7.48444300  | 15.29554500 |
| C | 5.44272400  | 4.78193200  | 14.78551900 |
| H | 6.12116000  | 4.74233900  | 15.63208300 |
| C | 2.56707500  | 4.36055600  | 10.30669900 |
| H | 1.52867300  | 4.04355600  | 10.11795700 |
| H | 3.19219600  | 3.46060600  | 10.34967100 |
| C | 0.14996100  | -1.37803300 | 6.81296500  |
| H | 0.46427200  | -1.70826200 | 7.80509500  |
| H | -0.07779200 | -2.26818700 | 6.22085600  |
| C | 0.52619500  | 6.50720400  | 11.73658800 |
| H | 0.16005900  | 6.26327600  | 10.74136300 |
| C | 5.71802000  | 4.02375800  | 13.63165000 |
| H | 6.61635100  | 3.41178200  | 13.59976700 |
| C | -1.85719800 | 0.00036700  | 10.03571000 |
| H | -1.94250200 | -1.05156900 | 9.77533700  |
| C | 0.26263000  | 7.72555200  | 13.82529000 |
| H | -0.32127000 | 8.40795900  | 14.43528600 |
| C | -0.19457600 | 7.36816100  | 12.54177600 |
| H | -1.13012200 | 7.78436500  | 12.17649500 |
| C | 3.40751100  | 0.54278600  | 14.26933700 |

|   |             |             |             |
|---|-------------|-------------|-------------|
| H | 3.99688500  | -0.37028600 | 14.36736100 |
| H | 2.82595000  | 0.66321700  | 15.18928900 |
| H | 4.09429500  | 1.39315800  | 14.20830400 |
| C | 1.12694900  | 2.03051100  | 12.95309800 |
| H | 0.69301100  | 2.06956600  | 13.95767100 |
| H | 0.29281200  | 2.01263100  | 12.24813500 |
| C | -1.70411700 | 2.73689900  | 10.74278600 |
| H | -1.64787400 | 3.78554700  | 11.02282300 |
| C | 5.23286100  | -1.40199900 | 12.11305400 |
| H | 5.75145800  | -0.68782700 | 12.75716300 |
| H | 5.98694300  | -2.06901300 | 11.68138300 |
| H | 4.57889100  | -2.01342700 | 12.74026200 |
| C | 1.23801900  | -1.05864500 | 12.75395900 |
| H | 0.50430000  | -1.04821300 | 11.94185700 |
| H | 0.68312200  | -1.17412900 | 13.69025100 |
| H | 1.86843600  | -1.94527400 | 12.63979800 |
| C | -2.23869700 | 1.81340300  | 11.61560500 |
| H | -2.60241000 | 2.13185600  | 12.58662800 |
| C | 5.56285100  | 0.38974300  | 9.67331700  |
| H | 5.07232000  | 1.11006100  | 9.01249400  |
| H | 6.16807500  | -0.28696000 | 9.06234900  |
| H | 6.24686500  | 0.95322800  | 10.31567200 |
| C | -2.30487100 | 0.44697400  | 11.25893600 |
| H | -2.72669700 | -0.26294400 | 11.96439000 |
| C | 3.43743600  | -1.88336500 | 9.71498200  |
| H | 2.61352200  | -2.32652000 | 10.28262600 |
| H | 4.13827800  | -2.68851800 | 9.47230700  |
| H | 3.03754000  | -1.49508300 | 8.77400300  |
| H | 1.68694600  | 2.96062600  | 12.80257300 |

**Cartesian coordinates of molecule 4 at the CAM-B3LYP/6-31G(d,p) level of theory:**

**Energy:** -2535.0285319 a.u.

|    |             |             |             |
|----|-------------|-------------|-------------|
| Si | 9.81481400  | 19.55412800 | 11.79132600 |
| Si | 10.71446500 | 17.47509100 | 9.76332300  |
| N  | 7.42512700  | 20.39603100 | 6.80836300  |
| N  | 6.40005100  | 18.53702800 | 6.99698000  |
| N  | 4.93084900  | 17.53093300 | 10.84864700 |
| N  | 5.29989400  | 17.28720200 | 8.76338800  |
| N  | 9.50018800  | 18.17264300 | 10.78951900 |
| C  | 6.75790100  | 15.78068900 | 12.83983400 |
| C  | 7.15269800  | 14.86161400 | 11.81475300 |
| C  | 7.11146400  | 13.44165600 | 9.84649600  |
| H  | 6.58041900  | 13.04063900 | 8.98596500  |
| C  | 10.48434900 | 24.66484400 | 7.00665600  |
| C  | 10.92377500 | 23.33216300 | 6.86582000  |
| C  | 7.39591100  | 19.27696200 | 7.58108300  |
| C  | 7.82917900  | 15.82550100 | 13.79175300 |
| C  | 3.75465100  | 17.03943500 | 10.29273600 |
| H  | 2.87080400  | 16.84758100 | 10.88037800 |

|   |             |             |             |
|---|-------------|-------------|-------------|
| C | 5.91208800  | 17.68911000 | 9.92221300  |
| C | 8.49816300  | 14.39187700 | 12.08509200 |
| C | 5.82246000  | 19.18197000 | 5.90928500  |
| H | 5.01714200  | 18.75645200 | 5.33103600  |
| C | 9.42350300  | 23.82298900 | 5.10107900  |
| C | 7.97382800  | 16.49966000 | 15.03391400 |
| H | 7.16390800  | 17.11106000 | 15.42535700 |
| C | 6.47994300  | 20.36026300 | 5.78662200  |
| H | 6.36144700  | 21.16566300 | 5.07871400  |
| C | 6.47835000  | 14.35576900 | 10.67099300 |
| H | 5.45611000  | 14.65980900 | 10.45946900 |
| C | 8.92299400  | 14.99811300 | 13.32364700 |
| C | 6.01054100  | 17.22704800 | 7.49663200  |
| H | 6.90884200  | 16.62177300 | 7.62615900  |
| H | 5.36810900  | 16.74705100 | 6.75717700  |
| C | 3.98458300  | 16.88699000 | 8.96531300  |
| H | 3.34373700  | 16.53998000 | 8.16975700  |
| C | 9.54922000  | 24.96821700 | 5.91437300  |
| C | 10.10777100 | 14.89144800 | 14.08033400 |
| H | 10.92456300 | 14.26551300 | 13.72852600 |
| C | 8.39694800  | 21.48755700 | 6.94004600  |
| H | 8.79547600  | 21.45304400 | 7.95381300  |
| H | 7.85630400  | 22.43121000 | 6.81982900  |
| C | 9.14434400  | 16.36168400 | 15.75845000 |
| H | 9.24441800  | 16.87224800 | 16.71292800 |
| C | 11.83770600 | 22.79292200 | 7.76486800  |
| H | 12.18451900 | 21.76793700 | 7.66484900  |
| C | 5.39718100  | 16.38844800 | 13.04067700 |
| H | 5.25158400  | 16.60408500 | 14.10704900 |
| H | 4.60647400  | 15.67095900 | 12.77583100 |
| C | 9.51723800  | 21.37408600 | 5.89204200  |
| H | 9.08124800  | 21.04972800 | 4.93959300  |
| H | 10.21544300 | 20.58602700 | 6.19445500  |
| C | 10.21721700 | 15.56665500 | 15.28522700 |
| H | 11.12319300 | 15.47969800 | 15.87762900 |
| C | 9.11899200  | 13.47375700 | 11.21443400 |
| H | 10.12547000 | 13.11943500 | 11.42486400 |
| C | 8.43345700  | 13.00263300 | 10.10605000 |
| H | 8.90292200  | 12.28517300 | 9.43950700  |
| C | 9.86694400  | 16.39043400 | 8.44501300  |
| H | 9.24356000  | 15.60753800 | 8.89290200  |
| H | 10.61274100 | 15.88887600 | 7.81671700  |
| H | 9.24417200  | 17.00029500 | 7.77726700  |
| C | 10.28768100 | 22.69123700 | 5.64015900  |
| H | 11.07400500 | 22.45648200 | 4.90764200  |
| C | 5.10552300  | 17.71081700 | 12.29441100 |
| H | 4.18534000  | 18.16893000 | 12.67554300 |
| H | 5.92209900  | 18.41858500 | 12.43646000 |
| C | 12.30814200 | 23.59182200 | 8.81353100  |
| H | 13.01857300 | 23.18104800 | 9.52431100  |
| C | 11.87037500 | 24.91275100 | 8.95485700  |
| H | 12.24610000 | 25.51820300 | 9.77436200  |

|    |             |             |             |
|----|-------------|-------------|-------------|
| C  | 10.95660800 | 25.46028000 | 8.05251100  |
| H  | 10.62392400 | 26.48835100 | 8.16481800  |
| C  | 9.73072400  | 21.19260700 | 10.81630000 |
| H  | 10.46971400 | 21.23681800 | 10.01032900 |
| H  | 9.90488800  | 22.05673900 | 11.46881600 |
| H  | 8.73777100  | 21.32833500 | 10.36639100 |
| C  | 8.60018800  | 23.84256900 | 3.98009700  |
| H  | 8.50941300  | 22.96853200 | 3.33926300  |
| C  | 11.74677500 | 18.75398000 | 8.78976100  |
| H  | 11.09722200 | 19.40149500 | 8.18921700  |
| H  | 12.44355900 | 18.25243100 | 8.10737200  |
| H  | 12.33895000 | 19.39751900 | 9.44981000  |
| C  | 11.48997400 | 19.51559000 | 12.69157800 |
| H  | 11.56725300 | 18.63043500 | 13.33286000 |
| H  | 11.60976200 | 20.39904500 | 13.33012900 |
| H  | 12.33751100 | 19.49572900 | 11.99751400 |
| C  | 7.89517100  | 25.01251200 | 3.67286800  |
| H  | 7.25210600  | 25.04115100 | 2.79813700  |
| C  | 8.84705700  | 26.13516500 | 5.60522400  |
| H  | 8.94091700  | 27.02186000 | 6.22570000  |
| C  | 11.95313900 | 16.36492100 | 10.68146200 |
| H  | 12.51770000 | 16.92680400 | 11.43269600 |
| H  | 12.67368800 | 15.91722000 | 9.98613100  |
| H  | 11.43964100 | 15.54755800 | 11.19886900 |
| C  | 8.01872800  | 26.14746700 | 4.48088300  |
| H  | 7.46716800  | 27.04859000 | 4.22924700  |
| C  | 8.48237300  | 19.73566300 | 13.13618700 |
| H  | 7.49107400  | 19.91134600 | 12.70017600 |
| H  | 8.70742700  | 20.60084200 | 13.77160700 |
| H  | 8.42043700  | 18.85921500 | 13.79033200 |
| Li | 8.59885400  | 16.72818700 | 11.81652800 |
| Li | 7.92445000  | 18.51894700 | 9.62115800  |

**(C) Computationally optimized structures of 2, 3, and 4:**

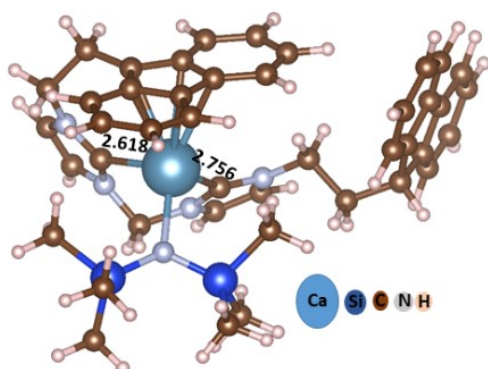

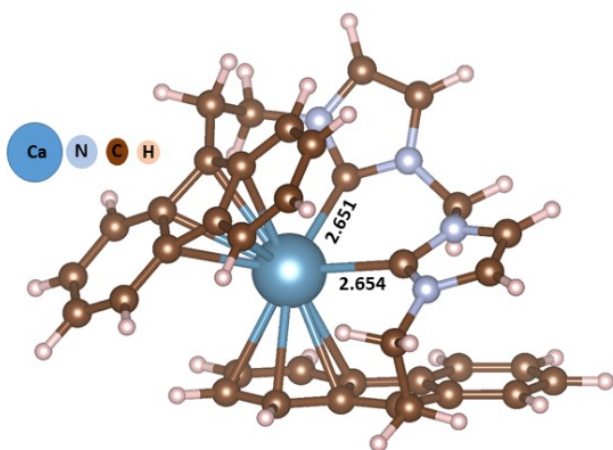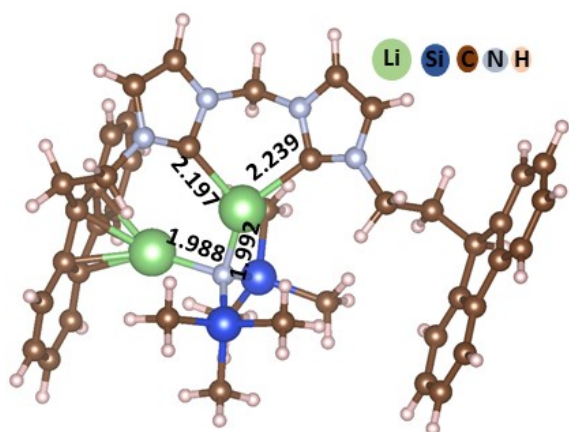

## 5. References.

1. A. Christoph Kaub, Sergei Lebedkin, Sebastian Bestgen, Ralf Köppe, Manfred M. Kappes and Peter W. Roesky *Chem. Commun.*, 2017, **53**, 9578-9581; B. Diez-Barra, Enrique, De la Hoz, Antonio, Sanchez-Migallon, Ana, Tejada, Juan, *Heterocycles* 1992, **34**, 1365-73.
2. Schlögl, B. Rieger, *Z. Naturforsch. Teil B* 2004, **59**, 233.
3. G. Sheldrick, *Acta Crystallogr., Sect. A: Found. Adv.*, 2015, **71**, 3.
4. G. Sheldrick, *Acta Crystallogr., Sect. C: Struct. Chem.*, 2015, **71**, 3.
5. O. V. Dolomanov, L. J. Bourhis, R. J. Gildea, J. A. K. Howard and H. Puschmann, *J. Appl. Crystallogr.*, 2009, **42**, 339.
6. K. Brandenburg, Diamond Version 4.6.0, Crystal Impact GbR, Bonn, 2019.
7. Yanai T., Tew D. P., Handy N. C., A new hybrid exchange-correlation functional using the Coulomb-attenuating method(CAM-B3LYP), *Chem. Phys. Lett.*, **393**, (2004), 51-57.
8. Gaussian 16, Revision C.01, Frisch, M. J.; Trucks, G. W.; Schlegel, H. B.; Scuseria, G. E.; Robb, M. A.; Cheeseman, J. R.; Scalmani, G.; Barone, V.; Petersson, G. A.; Nakatsuji, H.; Li, X.; Caricato, M.; Marenich, A. V.; Bloino, J.; Janesko, B. G.; Gomperts, R.; Mennucci, B.; Hratchian, H. P.; Ortiz, J. V.; Izmaylov, A. F.; Sonnenberg, J. L.; Williams-Young, D.; Ding, F.; Lipparini, F.; Egidi, F.; Goings, J.; Peng, B.; Petrone, A.; Henderson, T.; Ranasinghe, D.; Zakrzewski, V. G.; Gao, J.; Rega, N.; Zheng, G.; Liang, W.; Hada, M.; Ehara, M.; Toyota, K.; Fukuda, R.; Hasegawa, J.; Ishida, M.; Nakajima, T.; Honda, Y.;

Kitao, O.; Nakai, H.; Vreven, T.; Throssell, K.; Montgomery, J. A., Jr.; Peralta, J. E.; Ogliaro, F.; Bearpark, M. J.; Heyd, J. J.; Brothers, E. N.; Kudin, K. N.; Staroverov, V. N.; Keith, T. A.; Kobayashi, R.; Normand, J.; Raghavachari, K.; Rendell, A. P.; Burant, J. C.; Iyengar, S. S.; Tomasi, J.; Cossi, M.; Millam, J. M.; Klene, M.; Adamo, C.; Cammi, R.; Ochterski, J. W.; Martin, R. L.; Morokuma, K.; Farkas, O.; Foresman, J. B.; Fox, D. J. Gaussian, Inc., Wallingford CT, **2016**.

9. te Velde, G.; Bickelhaupt, F. M.; Baerends, E. J.; Guerra, C. F.; van Gisbergen, S. J. A.; Snijders, J. G.; Ziegler, T. Chemistry with ADF. *J. Comput. Chem.* **2001**, *22*, 931 – 967.

10. Mitoraj, M.; Michalak, A.; Ziegler, T. A Combined Charge and Energy Decomposition Scheme for Bond Analysis. *J. Chem. Theory Comput.* **2009**, *5*, 962–975.

11. <https://physics.nist.gov/PhysRefData/Handbook/Tables/calciumtable1.html>
